# Supplementary material for: Nitrogen Embedding Enhances Stability and Activity of Single-Atom Motifs of MXenes under Anodic Polarization
Source: Research Square preprint supplement (doi:10.21203/rs.3.rs-7039314/v1), 2025-07-14
Supplement: Supplementary file 1 [file f9b6ae4994392c72a878cc35.pdf]

## Nitrogen Embedding Enhances Stability and Activity of Single-Atom Motifs of MXenes under Anodic Polarization

Ling Meng,<sup>a,b</sup> Samad Razzaq,<sup>c</sup> Diwakar Singh,<sup>c</sup> Francesc Viñes,<sup>a,\*</sup> Francesc Illas,<sup>a</sup>

Kai S. Exner<sup>c,d,\*</sup>

<sup>a</sup> *Departament de Ciència de Materials i Química Física & Institut de Química Teòrica i Computacional (IQTUB), Universitat de Barcelona, c/ Martí i Franquès 1, 08028 Barcelona, Spain.*

<sup>b</sup> *State Key Laboratory of Chemical Resource Engineering, Beijing Engineering Center for Hierarchical Catalysts, College of Chemistry, Beijing University of Chemical Technology, Beijing 100029, China*

<sup>c</sup> *Faculty of Chemistry, Theoretical Catalysis and Electrochemistry, University of Duisburg-Essen, Essen 45141, Germany.*

<sup>d</sup> *Cluster of Excellence RESOLV, Bochum 44801, Germany; Center for Nanointegration (CENIDE) Duisburg-Essen, Duisburg 47057, Germany.*

\* Corresponding authors: [francesc.vines@ub.edu](mailto:francesc.vines@ub.edu); [kai.exner@uni-due.de](mailto:kai.exner@uni-due.de)

**Table S1.** Summary of the nitrogen doping thermodynamic feasibility of SAC-like MXenes,  $3\text{O}^*-\text{M}_{\text{SAC}}-\text{O}$ , of  $\text{M}_2\text{X}_1\text{O}$  MXene ( $\text{M} = \text{Cr, Fe, Hf, Mo, Nb, Ta, Ti, V, W, and Zr}$ ) using gas-phase DFT calculations.  $\Delta G$  is the Gibbs free energy of the nitrogen doping process (*cf.* Eq. (1)), and  $U_{\text{eq}}$  denotes the equilibrium potential of nitrogen doping process relative to the SHE.

| $\text{M}_2\text{C}_1\text{O}$ | $\Delta G / \text{eV}$ | $U_{\text{eq}} / \text{V}$ | $\text{M}_2\text{N}_1\text{O}$ | $\Delta G / \text{eV}$ | $U_{\text{eq}} / \text{V}$ |
|--------------------------------|------------------------|----------------------------|--------------------------------|------------------------|----------------------------|
| $\text{Cr}_2\text{C}$          | 3.32                   | 1.11                       | $\text{Cr}_2\text{N}$          | 3.65                   | 1.22                       |
| $\text{Fe}_2\text{C}$          | 2.34                   | 0.78                       | —                              | —                      | —                          |
| $\text{Hf}_2\text{C}$          | 4.24                   | 1.41                       | $\text{Hf}_2\text{N}$          | 5.28                   | 1.76                       |
| $\text{Mo}_2\text{C}$          | 2.28                   | 0.76                       | $\text{Mo}_2\text{N}$          | 1.44                   | 0.48                       |
| $\text{Nb}_2\text{C}$          | 4.18                   | 1.39                       | $\text{Nb}_2\text{N}$          | 4.12                   | 1.37                       |
| $\text{Ta}_2\text{C}$          | 3.70                   | 1.23                       | $\text{Ta}_2\text{N}$          | 3.41                   | 1.14                       |
| $\text{Ti}_2\text{C}$          | 4.79                   | 1.60                       | $\text{Ti}_2\text{N}$          | 5.34                   | 1.78                       |
| $\text{V}_2\text{C}$           | 4.44                   | 1.48                       | $\text{V}_2\text{N}$           | 3.31                   | 1.10                       |
| $\text{W}_2\text{C}$           | 0.07                   | 0.02                       | $\text{W}_2\text{N}$           | 0.40                   | 0.13                       |
| $\text{Zr}_2\text{C}$          | 5.07                   | 1.69                       | $\text{Zr}_2\text{N}$          | 5.66                   | 1.89                       |

**Table S2.** Summary of the nitrogen doping thermodynamic feasibility of SAC-like MXenes,  $3\text{O}^*-\text{M}_{\text{SAC}}-\text{O}$ , of  $\text{M}_3\text{X}_2\text{O}$  MXene ( $\text{M} = \text{Cr}, \text{Hf}, \text{Mo}, \text{Nb}, \text{Ta}, \text{Ti}, \text{V}, \text{W}$ , and  $\text{Zr}$ ) using gas-phase DFT calculations.  $\Delta G$  is the Gibbs free energy of the nitrogen doping process (*cf.* Eq. (1)), and  $U_{\text{eq}}$  denotes the equilibrium potential of nitrogen doping process relative to the SHE.

| $\text{M}_3\text{C}_2\text{O}$ | $\Delta G / \text{eV}$ | $U_{\text{eq}} / \text{V}$ | $\text{M}_3\text{N}_2\text{O}$ | $\Delta G / \text{eV}$ | $U_{\text{eq}} / \text{V}$ |
|--------------------------------|------------------------|----------------------------|--------------------------------|------------------------|----------------------------|
| —                              | —                      | —                          | $\text{Cr}_3\text{N}_2$        | 3.40                   | 1.13                       |
| $\text{Hf}_3\text{C}_2$        | 6.70                   | 2.23                       | $\text{Hf}_3\text{N}_2$        | 2.82                   | 0.94                       |
| $\text{Mo}_3\text{C}_2$        | 2.24                   | 0.75                       | $\text{Mo}_3\text{N}_2$        | 1.77                   | 0.59                       |
| $\text{Nb}_3\text{C}_2$        | 2.64                   | 0.88                       | $\text{Nb}_3\text{N}_2$        | 2.41                   | 0.80                       |
| $\text{Ta}_3\text{C}_2$        | 1.75                   | 0.58                       | $\text{Ta}_3\text{N}_2$        | 5.29                   | 1.76                       |
| $\text{Ti}_3\text{C}_2$        | 6.03                   | 2.01                       | $\text{Ti}_3\text{N}_2$        | 4.14                   | 1.38                       |
| $\text{V}_3\text{C}_2$         | 3.62                   | 1.21                       | $\text{V}_3\text{N}_2$         | 2.56                   | 0.85                       |
| $\text{W}_3\text{C}_2$         | 1.69                   | 0.56                       | $\text{W}_3\text{N}_2$         | 0.89                   | 0.30                       |
| $\text{Zr}_3\text{C}_2$        | 6.71                   | 2.24                       | $\text{Zr}_3\text{N}_2$        | 3.59                   | 1.20                       |

**Table S3.** Summary of the nitrogen doping thermodynamic feasibility of SAC-like MXenes,  $3\text{O}^*-\text{M}_{\text{SAC}}-\text{O}$ , of  $\text{M}_4\text{X}_3\text{O}$  MXene ( $\text{M} = \text{Cr}, \text{Fe}, \text{Hf}, \text{Mo}, \text{Nb}, \text{Ta}, \text{Ti}, \text{V}, \text{W}$ , and  $\text{Zr}$ ) using gas-phase DFT calculations.  $\Delta G$  is the Gibbs free energy of the nitrogen doping process (*cf.* Eq. (1)), and  $U_{\text{eq}}$  denotes the equilibrium potential of nitrogen doping process relative to the SHE.

| $\text{M}_4\text{C}_3\text{O}$ | $\Delta G / \text{eV}$ | $U_{\text{eq}} / \text{V}$ | $\text{M}_4\text{N}_3\text{O}$ | $\Delta G / \text{eV}$ | $U_{\text{eq}} / \text{V}$ |
|--------------------------------|------------------------|----------------------------|--------------------------------|------------------------|----------------------------|
| —                              | —                      | —                          | $\text{Cr}_4\text{N}_3$        | 3.54                   | 1.18                       |
| $\text{Hf}_4\text{C}_3$        | 7.40                   | 2.47                       | $\text{Hf}_4\text{N}_3$        | 4.06                   | 1.35                       |
| $\text{Mo}_4\text{C}_3$        | 2.25                   | 0.75                       | $\text{Mo}_4\text{N}_3$        | 1.80                   | 0.60                       |
| $\text{Nb}_4\text{C}_3$        | 3.47                   | 1.16                       | $\text{Nb}_4\text{N}_3$        | 2.27                   | 0.76                       |
| $\text{Ta}_4\text{C}_3$        | 2.74                   | 0.91                       | $\text{Ta}_4\text{N}_3$        | 1.30                   | 0.43                       |
| $\text{Ti}_4\text{C}_3$        | 6.72                   | 2.24                       | $\text{Ti}_4\text{N}_3$        | 4.65                   | 1.55                       |
| $\text{V}_4\text{C}_3$         | 3.86                   | 1.29                       | $\text{V}_4\text{N}_3$         | 3.04                   | 1.01                       |
| $\text{W}_4\text{C}_3$         | 1.86                   | 0.62                       | $\text{W}_4\text{N}_3$         | 0.78                   | 0.26                       |
| $\text{Zr}_4\text{C}_3$        | 7.35                   | 2.45                       | $\text{Zr}_4\text{N}_3$        | 4.60                   | 1.53                       |

**Table S4.** Standard electrode potentials of half reactions relevant to the studied SAC-like sites of MXenes. The standard potentials ( $E^\circ$ ) are provided in volts (V) relative to the standard hydrogen electrode (SHE).

| Element | Half Reaction                                                                                                         | $E^\circ$ / V | Electrons Transferred |
|---------|-----------------------------------------------------------------------------------------------------------------------|---------------|-----------------------|
| Cr      | $\text{Cr}^{2+} + 2\text{e}^- \rightleftharpoons \text{Cr}_{(\text{s})}$                                              | -0.91         | 2                     |
|         | $\text{Cr}^{3+} + 3\text{e}^- \rightleftharpoons \text{Cr}_{(\text{s})}$                                              | -0.74         | 3                     |
| Fe      | $\text{Fe}^{2+} + 2\text{e}^- \rightleftharpoons \text{Fe}_{(\text{s})}$                                              | -0.44         | 2                     |
|         | $\text{Fe}^{3+} + 3\text{e}^- \rightleftharpoons \text{Fe}_{(\text{s})}$                                              | -0.04         | 3                     |
|         | $\text{FeO}_4^{2-} + 6\text{e}^- + 8\text{H}^+ \rightleftharpoons \text{Fe}_{(\text{s})} + 4\text{H}_2\text{O}$       | 1.08          | 6                     |
| Hf      | $\text{HfO}(\text{OH})_2 + 4\text{H}^+ + 4\text{e}^- \rightleftharpoons \text{Hf}_{(\text{s})} + 3\text{H}_2\text{O}$ | -1.67         | 4                     |
|         | $\text{HfO}^{2+} + 4\text{H}^+ + 4\text{e}^- \rightleftharpoons \text{Hf}_{(\text{s})} + \text{H}_2\text{O}$          | -1.72         | 4                     |
| Mo      | $\text{Mo}^{3+} + 3\text{e}^- \rightleftharpoons \text{Mo}_{(\text{s})}$                                              | -0.21         | 3                     |
| Nb      | $\text{Nb}^{3+} + 3\text{e}^- \rightleftharpoons \text{Nb}_{(\text{s})}$                                              | -1.10         | 3                     |
| Ta      | $\text{Ta}^{3+} + 3\text{e}^- \rightleftharpoons \text{Ta}_{(\text{s})}$                                              | -0.60         | 3                     |
| Ti      | $\text{TiO}^{2+} + 4\text{e}^- + 2\text{H}^+ \rightleftharpoons \text{Ti}_{(\text{s})} + \text{H}_2\text{O}$          | -0.93         | 4                     |
|         | $\text{Ti}^{3+} + 3\text{e}^- \rightleftharpoons \text{Ti}_{(\text{s})}$                                              | -1.37         | 3                     |
|         | $\text{Ti}^{2+} + 2\text{e}^- \rightleftharpoons \text{Ti}_{(\text{s})}$                                              | -1.63         | 2                     |
| V       | $\text{V}^{2+} + 2\text{e}^- \rightleftharpoons \text{V}_{(\text{s})}$                                                | -1.13         | 2                     |
|         | $\text{V}^{3+} + 3\text{e}^- \rightleftharpoons \text{V}_{(\text{s})}$                                                | -0.84         | 3                     |

|    |                                                                                                                       |       |   |
|----|-----------------------------------------------------------------------------------------------------------------------|-------|---|
|    | $\text{VOH}^{2+} + 3\text{e}^- + \text{H}^+ \rightleftharpoons \text{V}_{(\text{s})} + \text{H}_2\text{O}$            | -0.78 | 3 |
|    | $\text{VO}^{2+} + 4\text{e}^- + 2\text{H}^+ \rightleftharpoons \text{V}_{(\text{s})} + \text{H}_2\text{O}$            | -0.55 | 4 |
|    | $\text{VO}_2^+ + 5\text{e}^- + 4\text{H}^+ \rightleftharpoons \text{V}_{(\text{s})} + \text{H}_2\text{O}$             | -0.24 | 5 |
|    | $\text{VO}(\text{OH})^+ + 4\text{e}^- + 3\text{H}^+ \rightleftharpoons \text{V}_{(\text{s})} + 2\text{H}_2\text{O}$   | -0.47 | 4 |
| W  | $\text{WO}_{3(\text{aq})} + 6\text{e}^- + 6\text{H}^+ \rightleftharpoons \text{W}_{(\text{s})} + 3\text{H}_2\text{O}$ | -0.09 | 6 |
| Zr | $\text{Zr}^{4+} + 4\text{e}^- \rightleftharpoons \text{Zr}_{(\text{s})}$                                              | -1.45 | 4 |

**Table S5.** Summary of the thermodynamic stability of screened nitrogen doped SAC-like sites on the MXene basal plane,  $3\text{N}^*\text{-M}_{\text{SAC}}\text{-*O}$ , of  $\text{M}_2\text{C}_1\text{O}$  MXene ( $\text{M} = \text{Cr}, \text{Fe}, \text{Mo}, \text{Ta},$  and  $\text{W}$ ) in the context of the *a*) pre-OER scenario (*cf.* **Figure S1**) using gas-phase DFT calculations.  $\text{M}^{n+}$  represents different ions resulting from the dissolution of the corresponding metal atom at the SAC site into solution,  $n$  is total number of electron transfers in the overall reaction,  $\Delta G$  is the Gibbs free energy of the dissolution process, and  $U_{\text{diss}}$  denotes the dissolution potential relative to the SHE.

| $\text{M}_2\text{C}_1\text{O}$ | $\text{M}^{n+}$            | $n$ | $\Delta G / \text{eV}$ | $U_{\text{diss}} / \text{V}$ |
|--------------------------------|----------------------------|-----|------------------------|------------------------------|
| $\text{Cr}_2\text{C}$          | $\text{Cr}^{2+}$           | 0   | 0.57                   | —                            |
|                                | $\text{Cr}^{3+}$           | 1   | 0.17                   | 0.17                         |
| $\text{Fe}_2\text{C}$          | $\text{Fe}^{2+}$           | 0   | -2.20                  | —                            |
|                                | $\text{Fe}^{3+}$           | 1   | -1.44                  | -1.44                        |
|                                | $\text{FeO}_4^{2-}$        | 4   | 5.16                   | 1.29                         |
| $\text{Mo}_2\text{C}$          | $\text{Mo}^{3+}$           | 1   | 4.65                   | 4.65                         |
| $\text{Ta}_2\text{C}$          | $\text{Ta}^{3+}$           | 1   | 4.74                   | 4.74                         |
| $\text{W}_2\text{C}$           | $\text{WO}_{3(\text{aq})}$ | 4   | 3.93                   | 0.98                         |

**Table S6.** Summary of the thermodynamic stability of screened undoped SAC-like sites on the MXene basal plane,  $3\text{O}^*-\text{M}_{\text{SAC}}-\text{O}^*$ , of  $\text{M}_2\text{C}_1\text{O}$  MXene ( $\text{M} = \text{Cr}, \text{Fe}, \text{Mo}, \text{Ta}, \text{and W}$ ) in the context of the *a*) pre-OER scenario (*cf.* **Figure S1**) using gas-phase DFT calculations.  $\text{M}^{n+}$  represents different ions resulting from the dissolution of the corresponding metal atom at the SAC site into solution,  $n$  is total number of electron transfers in the overall reaction,  $\Delta G$  is the Gibbs free energy of the dissolution process, and  $U_{\text{diss}}$  denotes the dissolution potential relative to the SHE.

| $\text{M}_2\text{C}_1\text{O}$ | $\text{M}^{n+}$            | $n$ | $\Delta G / \text{eV}$ | $U_{\text{diss}} / \text{V}$ |
|--------------------------------|----------------------------|-----|------------------------|------------------------------|
| $\text{Cr}_2\text{C}$          | $\text{Cr}^{2+}$           | 0   | 0.88                   | —                            |
|                                | $\text{Cr}^{3+}$           | 1   | 0.48                   | 0.48                         |
| $\text{Fe}_2\text{C}$          | $\text{Fe}^{2+}$           | 0   | 1.43                   | —                            |
|                                | $\text{Fe}^{3+}$           | 1   | 2.19                   | 2.19                         |
|                                | $\text{FeO}_4^{2-}$        | 4   | 8.79                   | 2.20                         |
| $\text{Mo}_2\text{C}$          | $\text{Mo}^{3+}$           | 1   | 3.25                   | 3.25                         |
| $\text{Ta}_2\text{C}$          | $\text{Ta}^{3+}$           | 1   | 2.32                   | 2.32                         |
| $\text{W}_2\text{C}$           | $\text{WO}_{3(\text{aq})}$ | 4   | -1.38                  | -0.35                        |



**Table S7.** Summary of the thermodynamic stability of screened nitrogen doped SAC-like sites on the MXene basal plane,  $3\text{N}^*\text{-M}_{\text{SAC}}\text{-*O}$ , of  $\text{M}_2\text{C}_1\text{O}$  MXene ( $\text{M} = \text{Cr, Fe, Mo, Ta, and W}$ ) in the context of the *b*) OER scenario (*cf.* **Figure S2**) using gas-phase DFT calculations.  $\text{M}^{n+}$  represents different ions resulting from the dissolution of the corresponding metal atom at the SAC site into solution,  $n$  is total number of electron transfers in the overall reaction,  $\Delta G$  is the Gibbs free energy of the dissolution process, and  $U_{\text{diss}}$  denotes the dissolution potential relative to the SHE.

| $\text{M}_2\text{CO}$ | $\text{M}^{n+}$            | $n$ | $\Delta G / \text{eV}$ | $U_{\text{diss}} / \text{V}$ |
|-----------------------|----------------------------|-----|------------------------|------------------------------|
| $\text{Cr}_2\text{C}$ | $\text{Cr}^{2+}$           | 4   | 5.48                   | 1.37                         |
|                       | $\text{Cr}^{3+}$           | 5   | 5.08                   | 1.02                         |
| $\text{Fe}_2\text{C}$ | $\text{Fe}^{2+}$           | 4   | 2.72                   | 0.68                         |
|                       | $\text{Fe}^{3+}$           | 5   | 3.48                   | 0.70                         |
|                       | $\text{FeO}_4^{2-}$        | 8   | 10.08                  | 1.26                         |
| $\text{Mo}_2\text{C}$ | $\text{Mo}^{3+}$           | 5   | 9.56                   | 1.91                         |
| $\text{Ta}_2\text{C}$ | $\text{Ta}^{3+}$           | 5   | 9.66                   | 1.93                         |
| $\text{W}_2\text{C}$  | $\text{WO}_{3(\text{aq})}$ | 8   | 8.85                   | 1.11                         |

**Table S8.** Summary of the thermodynamic stability of screened undoped SAC-like sites on the MXene basal plane,  $3\text{O}^*-\text{M}_{\text{SAC}}-\text{O}^*$ , of  $\text{M}_2\text{C}_1\text{O}$  MXene ( $\text{M} = \text{Cr}, \text{Fe}, \text{Mo}, \text{Ta}, \text{and W}$ ) in the context of the *b*) OER scenario (*cf.* **Figure S2**) using gas-phase DFT calculations.  $\text{M}^{n+}$  represents different ions resulting from the dissolution of the corresponding metal atom at the SAC site into solution,  $n$  is total number of electron transfers in the overall reaction,  $\Delta G$  is the Gibbs free energy of the dissolution process, and  $U_{\text{diss}}$  denotes the dissolution potential relative to the SHE.

| $\text{M}_2\text{C}_1\text{O}$ | $\text{M}^{n+}$            | $n$ | $\Delta G / \text{eV}$ | $U_{\text{diss}} / \text{V}$ |
|--------------------------------|----------------------------|-----|------------------------|------------------------------|
| $\text{Cr}_2\text{C}$          | $\text{Cr}^{2+}$           | 4   | 5.80                   | 1.45                         |
|                                | $\text{Cr}^{3+}$           | 5   | 5.40                   | 1.08                         |
| $\text{Fe}_2\text{C}$          | $\text{Fe}^{2+}$           | 4   | 6.35                   | 1.59                         |
|                                | $\text{Fe}^{3+}$           | 5   | 7.11                   | 1.42                         |
|                                | $\text{FeO}_4^{2-}$        | 8   | 13.71                  | 1.71                         |
| $\text{Mo}_2\text{C}$          | $\text{Mo}^{3+}$           | 5   | 8.17                   | 1.63                         |
| $\text{Ta}_2\text{C}$          | $\text{Ta}^{3+}$           | 5   | 7.24                   | 1.45                         |
| $\text{W}_2\text{C}$           | $\text{WO}_{3(\text{aq})}$ | 8   | 3.53                   | 0.44                         |

**Table S9.** Summary of the thermodynamic stability of screened nitrogen doped SAC-like sites on the MXene basal plane,  $3\text{N}^*\text{-M}_{\text{SAC}}\text{-*O}$ , of  $\text{M}_2\text{N}_1\text{O}$  MXene ( $\text{M} = \text{Cr}, \text{Mo}, \text{Ta}, \text{V}$  and  $\text{W}$ ) in the context of the *a*) pre-OER scenario (*cf.* **Figure S1**) using gas-phase DFT calculations.  $\text{M}^{n+}$  represents different ions resulting from the dissolution of the corresponding metal atom at the SAC site into solution,  $n$  is total number of electron transfers in the overall reaction,  $\Delta G$  is the Gibbs free energy of the dissolution process, and  $U_{\text{diss}}$  denotes the dissolution potential relative to the SHE.

| $\text{M}_2\text{N}_1\text{O}$ | $\text{M}^{n+}$            | $n$ | $\Delta G / \text{eV}$ | $U_{\text{diss}} / \text{V}$ |
|--------------------------------|----------------------------|-----|------------------------|------------------------------|
| $\text{Cr}_2\text{N}$          | $\text{Cr}^{2+}$           | 0   | 0.12                   | —                            |
|                                | $\text{Cr}^{3+}$           | 1   | -0.28                  | -0.28                        |
| $\text{Mo}_2\text{N}$          | $\text{Mo}^{3+}$           | 1   | 4.46                   | 4.46                         |
| $\text{Ta}_2\text{N}$          | $\text{Ta}^{3+}$           | 1   | 3.95                   | 3.95                         |
| $\text{V}_2\text{N}$           | $\text{V}^{2+}$            | 0   | 1.63                   | —                            |
|                                | $\text{V}^{3+}$            | 1   | 1.37                   | 1.37                         |
|                                | $\text{VOH}^{2+}$          | 1   | 1.55                   | 1.55                         |
|                                | $\text{VO}^{2+}$           | 2   | 1.69                   | 0.84                         |
|                                | $\text{VO}_2^+$            | 3   | 2.69                   | 0.90                         |
|                                | $\text{VO(OH)}^+$          | 2   | 2.01                   | 1.00                         |
| $\text{W}_2\text{N}$           | $\text{WO}_{3(\text{aq})}$ | 4   | 2.95                   | 0.74                         |

**Table S10.** Summary of the thermodynamic stability of screened undoped SAC-like sites on the MXene basal plane,  $3\text{O}^*-\text{M}_{\text{SAC}}-\text{O}$ , of  $\text{M}_2\text{N}_1\text{O}$  MXene ( $\text{M} = \text{Cr}, \text{Mo}, \text{Ta}, \text{V}$  and  $\text{W}$ ) in the context of the *a*) pre-OER scenario (*cf.* **Figure S1**) using gas-phase DFT calculations.  $\text{M}^{n+}$  represents different ions resulting from the dissolution of the corresponding metal atom at the SAC site into solution,  $n$  is total number of electron transfers in the overall reaction,  $\Delta G$  is the Gibbs free energy of the dissolution process, and  $U_{\text{diss}}$  denotes the dissolution potential relative to the SHE.

| $\text{M}_2\text{N}_1\text{O}$ | $\text{M}^{n+}$            | $n$ | $\Delta G / \text{eV}$ | $U_{\text{diss}} / \text{V}$ |
|--------------------------------|----------------------------|-----|------------------------|------------------------------|
| $\text{Cr}_2\text{N}$          | $\text{Cr}^{2+}$           | 0   | 1.07                   | —                            |
|                                | $\text{Cr}^{3+}$           | 1   | 0.67                   | 0.67                         |
| $\text{Mo}_2\text{N}$          | $\text{Mo}^{3+}$           | 1   | 1.63                   | 1.63                         |
| $\text{Ta}_2\text{N}$          | $\text{Ta}^{3+}$           | 1   | 2.31                   | 2.31                         |
| $\text{V}_2\text{N}$           | $\text{V}^{2+}$            | 0   | 1.04                   | —                            |
|                                | $\text{V}^{3+}$            | 1   | 0.78                   | 0.78                         |
|                                | $\text{VOH}^{2+}$          | 1   | 0.96                   | 0.96                         |
|                                | $\text{VO}^{2+}$           | 2   | 1.10                   | 0.55                         |
|                                | $\text{VO}_2^+$            | 3   | 2.10                   | 0.70                         |
|                                | $\text{VO(OH)}^+$          | 2   | 1.42                   | 0.71                         |
| $\text{W}_2\text{N}$           | $\text{WO}_{3(\text{aq})}$ | 4   | -0.82                  | -0.20                        |

**Table S11.** Summary of the thermodynamic stability of screened nitrogen doped SAC-like sites on the MXene basal plane,  $3\text{N}^*\text{-M}_{\text{SAC}}\text{-*O}$ , of  $\text{M}_2\text{N}_1\text{O}$  MXene ( $\text{M} = \text{Cr}, \text{Mo}, \text{Ta}, \text{V}$  and  $\text{W}$ ) in the context of the *b*) OER scenario (*cf.* **Figure S2**) using gas-phase DFT calculations.  $\text{M}^{n+}$  represents different ions resulting from the dissolution of the corresponding metal atom at the SAC site into solution,  $n$  is total number of electron transfers in the overall reaction,  $\Delta G$  is the Gibbs free energy of the dissolution process, and  $U_{\text{diss}}$  denotes the dissolution potential relative to the SHE.

| $\text{M}_2\text{N}_1\text{O}$ | $\text{M}^{n+}$            | $n$ | $\Delta G / \text{eV}$ | $U_{\text{diss}} / \text{V}$ |
|--------------------------------|----------------------------|-----|------------------------|------------------------------|
| $\text{Cr}_2\text{N}$          | $\text{Cr}^{2+}$           | 4   | 5.04                   | 1.26                         |
|                                | $\text{Cr}^{3+}$           | 5   | 4.64                   | 0.93                         |
| $\text{Mo}_2\text{N}$          | $\text{Mo}^{3+}$           | 5   | 9.37                   | 1.87                         |
| $\text{Ta}_2\text{N}$          | $\text{Ta}^{3+}$           | 5   | 8.87                   | 1.77                         |
| $\text{V}_2\text{N}$           | $\text{V}^{2+}$            | 4   | 6.54                   | 1.64                         |
|                                | $\text{V}^{3+}$            | 5   | 6.28                   | 1.26                         |
|                                | $\text{VOH}^{2+}$          | 5   | 6.46                   | 1.29                         |
|                                | $\text{VO}^{2+}$           | 6   | 6.60                   | 1.10                         |
|                                | $\text{VO}_2^+$            | 7   | 7.60                   | 1.09                         |
|                                | $\text{VO}(\text{OH})^+$   | 6   | 6.92                   | 1.15                         |
| $\text{W}_2\text{N}$           | $\text{WO}_{3(\text{aq})}$ | 8   | 7.87                   | 0.98                         |

**Table S12.** Summary of the thermodynamic stability of screened undoped SAC-like sites on the MXene basal plane,  $3\text{O}^*-\text{M}_{\text{SAC}}-\text{O}$ , of  $\text{M}_2\text{N}_1\text{O}$  MXene ( $\text{M} = \text{Cr}, \text{Mo}, \text{Ta}, \text{V}$  and  $\text{W}$ ) in the context of the *b*) OER scenario (*cf.* **Figure S2**) using gas-phase DFT calculations.  $\text{M}^{n+}$  represents different ions resulting from the dissolution of the corresponding metal atom at the SAC site into solution,  $n$  is total number of electron transfers in the overall reaction,  $\Delta G$  is the Gibbs free energy of the dissolution process, and  $U_{\text{diss}}$  denotes the dissolution potential relative to the SHE.

| $\text{M}_2\text{N}_1\text{O}$ | $\text{M}^{n+}$            | $n$ | $\Delta G / \text{eV}$ | $U_{\text{diss}} / \text{V}$ |
|--------------------------------|----------------------------|-----|------------------------|------------------------------|
| $\text{Cr}_2\text{N}$          | $\text{Cr}^{2+}$           | 4   | 5.99                   | 1.45                         |
|                                | $\text{Cr}^{3+}$           | 5   | 5.59                   | 1.12                         |
| $\text{Mo}_2\text{N}$          | $\text{Mo}^{3+}$           | 5   | 6.55                   | 1.31                         |
| $\text{Ta}_2\text{N}$          | $\text{Ta}^{3+}$           | 5   | 7.23                   | 1.45                         |
| $\text{V}_2\text{N}$           | $\text{V}^{2+}$            | 4   | 5.96                   | 1.49                         |
|                                | $\text{V}^{3+}$            | 5   | 5.70                   | 1.14                         |
|                                | $\text{VOH}^{2+}$          | 5   | 5.88                   | 1.18                         |
|                                | $\text{VO}^{2+}$           | 6   | 6.02                   | 1.00                         |
|                                | $\text{VO}_2^+$            | 7   | 7.02                   | 1.00                         |
|                                | $\text{VO}(\text{OH})^+$   | 6   | 6.34                   | 1.06                         |
| $\text{W}_2\text{N}$           | $\text{WO}_{3(\text{aq})}$ | 8   | 4.10                   | 0.51                         |

**Table S13.** Summary of the thermodynamic stability of screened nitrogen doped SAC-like sites on the MXene basal plane,  $3\text{N}^*-\text{M}_{\text{SAC}}-\text{O}$ , of  $\text{M}_3\text{C}_2\text{O}$  MXene ( $\text{M} = \text{Mo}, \text{Nb}, \text{Ta}, \text{V}$  and  $\text{W}$ ) in the context of the *a*) pre-OER scenario (*cf.* **Figure S1**) using gas-phase DFT calculations.  $\text{M}^{n+}$  represents different ions resulting from the dissolution of the corresponding metal atom at the SAC site into solution,  $n$  is total number of electron transfers in the overall reaction,  $\Delta G$  is the Gibbs free energy of the dissolution process, and  $U_{\text{diss}}$  denotes the dissolution potential relative to the SHE.

| $\text{M}_3\text{C}_2\text{O}$ | $\text{M}^{n+}$            | $n$ | $\Delta G / \text{eV}$ | $U_{\text{diss}} / \text{V}$ |
|--------------------------------|----------------------------|-----|------------------------|------------------------------|
| $\text{Mo}_3\text{C}_2$        | $\text{Mo}^{3+}$           | 1   | 4.55                   | 4.55                         |
| $\text{Nb}_3\text{C}_2$        | $\text{Nb}^{3+}$           | 1   | 0.69                   | 0.69                         |
| $\text{Ta}_3\text{C}_2$        | $\text{Ta}^{3+}$           | 1   | 2.38                   | 2.38                         |
| $\text{V}_3\text{C}_2$         | $\text{V}^{2+}$            | 0   | 1.61                   | —                            |
|                                | $\text{V}^{3+}$            | 1   | 1.35                   | 1.35                         |
|                                | $\text{VOH}^{2+}$          | 1   | 1.53                   | 1.53                         |
|                                | $\text{VO}^{2+}$           | 2   | 1.67                   | 0.84                         |
|                                | $\text{VO}_2^+$            | 3   | 2.67                   | 0.89                         |
|                                | $\text{VO(OH)}^+$          | 2   | 1.99                   | 1.00                         |
| $\text{W}_3\text{C}_2$         | $\text{WO}_{3(\text{aq})}$ | 4   | 4.32                   | 1.08                         |

**Table S14.** Summary of the thermodynamic stability of screened undoped SAC-like sites on the MXene basal plane,  $3\text{O}^*-\text{M}_{\text{SAC}}-\text{O}^*$ , of  $\text{M}_3\text{C}_2\text{O}$  MXene ( $\text{M} = \text{Mo}, \text{Nb}, \text{Ta}, \text{V}$  and  $\text{W}$ ) in the context of the *a)* pre-OER scenario (*cf.* **Figure S1**) using gas-phase DFT calculations.  $\text{M}^{n+}$  represents different ions resulting from the dissolution of the corresponding metal atom at the SAC site into solution,  $n$  is total number of electron transfers in the overall reaction,  $\Delta G$  is the Gibbs free energy of the dissolution process, and  $U_{\text{diss}}$  denotes the dissolution potential relative to the SHE.

| $\text{M}_3\text{C}_2\text{O}$ | $\text{M}^{n+}$            | $n$ | $\Delta G / \text{eV}$ | $U_{\text{diss}} / \text{V}$ |
|--------------------------------|----------------------------|-----|------------------------|------------------------------|
| $\text{Mo}_3\text{C}_2$        | $\text{Mo}^{3+}$           | 1   | 3.00                   | 3.00                         |
| $\text{Nb}_3\text{C}_2$        | $\text{Nb}^{3+}$           | 1   | -0.90                  | -0.90                        |
| $\text{Ta}_3\text{C}_2$        | $\text{Ta}^{3+}$           | 1   | 0.14                   | 0.14                         |
| $\text{V}_3\text{C}_2$         | $\text{V}^{2+}$            | 0   | 1.11                   | —                            |
|                                | $\text{V}^{3+}$            | 1   | 0.85                   | 0.85                         |
|                                | $\text{VOH}^{2+}$          | 1   | 1.03                   | 1.03                         |
|                                | $\text{VO}^{2+}$           | 2   | 1.17                   | 0.58                         |
|                                | $\text{VO}_2^+$            | 3   | 2.17                   | 0.72                         |
|                                | $\text{VO(OH)}^+$          | 2   | 1.49                   | 0.74                         |
| $\text{W}_3\text{C}_2$         | $\text{WO}_{3(\text{aq})}$ | 4   | 1.11                   | 0.28                         |



**Table S15.** Summary of the thermodynamic stability of screened nitrogen doped SAC-like sites on the MXene basal plane,  $3\text{N}^*\text{-M}_{\text{SAC}}\text{-*O}$ , of  $\text{M}_3\text{C}_2\text{O}$  MXene ( $\text{M} = \text{Mo}, \text{Nb}, \text{Ta}, \text{V}$  and  $\text{W}$ ) in the context of the *b*) OER scenario (*cf.* **Figure S2**) using gas-phase DFT calculations.  $\text{M}^{n+}$  represents different ions resulting from the dissolution of the corresponding metal atom at the SAC site into solution,  $n$  is total number of electron transfers in the overall reaction,  $\Delta G$  is the Gibbs free energy of the dissolution process, and  $U_{\text{diss}}$  denotes the dissolution potential relative to the SHE.

| $\text{M}_3\text{C}_2\text{O}$ | $\text{M}^{n+}$            | $n$ | $\Delta G / \text{eV}$ | $U_{\text{diss}} / \text{V}$ |
|--------------------------------|----------------------------|-----|------------------------|------------------------------|
| $\text{Mo}_3\text{C}_2$        | $\text{Mo}^{3+}$           | 5   | 9.47                   | 1.89                         |
| $\text{Nb}_3\text{C}_2$        | $\text{Nb}^{3+}$           | 5   | 5.61                   | 1.12                         |
| $\text{Ta}_3\text{C}_2$        | $\text{Ta}^{3+}$           | 5   | 7.30                   | 1.46                         |
| $\text{V}_3\text{C}_2$         | $\text{V}^{2+}$            | 4   | 6.53                   | 1.63                         |
|                                | $\text{V}^{3+}$            | 5   | 6.27                   | 1.25                         |
|                                | $\text{VOH}^{2+}$          | 5   | 6.45                   | 1.29                         |
|                                | $\text{VO}^{2+}$           | 6   | 6.59                   | 1.10                         |
|                                | $\text{VO}_2^+$            | 7   | 7.59                   | 1.08                         |
|                                | $\text{VO(OH)}^+$          | 6   | 6.91                   | 1.15                         |
| $\text{W}_3\text{C}_2$         | $\text{WO}_{3(\text{aq})}$ | 8   | 9.23                   | 1.15                         |

**Table S16.** Summary of the thermodynamic stability of screened undoped SAC-like sites on the MXene basal plane,  $3\text{O}^*-\text{M}_{\text{SAC}}-\text{O}^*$ , of  $\text{M}_3\text{C}_2\text{O}$  MXene ( $\text{M} = \text{Mo}, \text{Nb}, \text{Ta}, \text{V}$  and  $\text{W}$ ) in the context of the *b*) OER scenario (*cf.* **Figure S2**) using gas-phase DFT calculations.  $\text{M}^{n+}$  represents different ions resulting from the dissolution of the corresponding metal atom at the SAC site into solution,  $n$  is total number of electron transfers in the overall reaction,  $\Delta G$  is the Gibbs free energy of the dissolution process, and  $U_{\text{diss}}$  denotes the dissolution potential relative to the SHE.

| $\text{M}_3\text{C}_2\text{O}$ | $\text{M}^{n+}$            | $n$ | $\Delta G / \text{eV}$ | $U_{\text{diss}} / \text{V}$ |
|--------------------------------|----------------------------|-----|------------------------|------------------------------|
| $\text{Mo}_3\text{C}_2$        | $\text{Mo}^{3+}$           | 5   | 7.92                   | 1.58                         |
| $\text{Nb}_3\text{C}_2$        | $\text{Nb}^{3+}$           | 5   | 4.02                   | 0.80                         |
| $\text{Ta}_3\text{C}_2$        | $\text{Ta}^{3+}$           | 5   | 5.06                   | 1.01                         |
| $\text{V}_3\text{C}_2$         | $\text{V}^{2+}$            | 4   | 6.03                   | 1.51                         |
|                                | $\text{V}^{3+}$            | 5   | 5.77                   | 1.15                         |
|                                | $\text{VOH}^{2+}$          | 5   | 5.95                   | 1.19                         |
|                                | $\text{VO}^{2+}$           | 6   | 6.09                   | 1.01                         |
|                                | $\text{VO}_2^+$            | 7   | 7.09                   | 1.01                         |
|                                | $\text{VO}(\text{OH})^+$   | 6   | 6.41                   | 1.07                         |
| $\text{W}_3\text{C}_2$         | $\text{WO}_{3(\text{aq})}$ | 8   | 6.03                   | 0.75                         |

**Table S17.** Summary of the thermodynamic stability of screened undoped SAC-like sites on the MXene basal plane,  $3\text{N}^*\text{-M}_{\text{SAC}}\text{-*O}$ , of  $\text{M}_3\text{N}_2\text{O}$  MXene ( $\text{M} = \text{Cr, Hf, Mo, Nb, V, W, and Zr}$ ) in the context of the *a*) pre-OER scenario (*cf.* **Figure S1**) using gas-phase DFT calculations.  $\text{M}^{n+}$  represents different ions resulting from the dissolution of the corresponding metal atom at the SAC site into solution,  $n$  is total number of electron transfers in the overall reaction,  $\Delta G$  is the Gibbs free energy of the dissolution process, and  $U_{\text{diss}}$  denotes the dissolution potential relative to the SHE.

| $\text{M}_3\text{N}_2\text{O}$ | $\text{M}^{n+}$            | $n$ | $\Delta G / \text{eV}$ | $U_{\text{diss}} / \text{V}$ |
|--------------------------------|----------------------------|-----|------------------------|------------------------------|
| $\text{Cr}_3\text{N}_2$        | $\text{Cr}^{2+}$           | 0   | 1.17                   | —                            |
|                                | $\text{Cr}^{3+}$           | 1   | 0.77                   | 0.77                         |
| $\text{Hf}_3\text{N}_2$        | $\text{HfO}(\text{OH})_2$  | 2   | -0.72                  | -0.36                        |
|                                | $\text{HfO}^{2+}$          | 2   | -0.94                  | -0.47                        |
| $\text{Mo}_3\text{N}_2$        | $\text{Mo}^{3+}$           | 1   | 4.78                   | 4.78                         |
| $\text{Nb}_3\text{N}_2$        | $\text{Nb}^{3+}$           | 1   | 0.27                   | 0.27                         |
| $\text{V}_3\text{N}_2$         | $\text{V}^{2+}$            | 0   | 1.09                   | —                            |
|                                | $\text{V}^{3+}$            | 1   | 0.83                   | 0.83                         |
|                                | $\text{VOH}^{2+}$          | 1   | 1.01                   | 1.01                         |
|                                | $\text{VO}^{2+}$           | 2   | 1.15                   | 0.58                         |
|                                | $\text{VO}_2^+$            | 3   | 2.15                   | 0.72                         |
|                                | $\text{VO}(\text{OH})^+$   | 2   | 1.47                   | 0.74                         |
| $\text{W}_3\text{N}_2$         | $\text{WO}_{3(\text{aq})}$ | 4   | 3.38                   | 0.85                         |
| $\text{Zr}_3\text{N}_2$        | $\text{Zr}^{4+}$           | 2   | -0.09                  | -0.04                        |

**Table S18.** Summary of the thermodynamic stability of screened undoped SAC-like sites on the MXene basal plane,  $3\text{O}^*-\text{M}_{\text{SAC}}-\text{O}$ , of  $\text{M}_3\text{N}_2\text{O}$  MXene ( $\text{M} = \text{Cr}, \text{Hf}, \text{Mo}, \text{Nb}, \text{V}, \text{W}$ , and  $\text{Zr}$ ) in the context of the *a*) pre-OER scenario (*cf.* **Figure S1**) using gas-phase DFT calculations.  $\text{M}^{n+}$  represents different ions resulting from the dissolution of the corresponding metal atom at the SAC site into solution,  $n$  is total number of electron transfers in the overall reaction,  $\Delta G$  is the Gibbs free energy of the dissolution process, and  $U_{\text{diss}}$  denotes the dissolution potential relative to the SHE.

| $\text{M}_3\text{N}_2\text{O}$ | $\text{M}^{n+}$            | $n$ | $\Delta G / \text{eV}$ | $U_{\text{diss}} / \text{V}$ |
|--------------------------------|----------------------------|-----|------------------------|------------------------------|
| $\text{Cr}_3\text{N}_2$        | $\text{Cr}^{2+}$           | 0   | 1.14                   | —                            |
|                                | $\text{Cr}^{3+}$           | 1   | 0.74                   | 0.74                         |
| $\text{Hf}_3\text{N}_2$        | $\text{HfO}(\text{OH})_2$  | 2   | -4.46                  | -2.23                        |
|                                | $\text{HfO}^{2+}$          | 2   | -4.68                  | -2.34                        |
| $\text{Mo}_3\text{N}_2$        | $\text{Mo}^{3+}$           | 1   | 1.93                   | 1.93                         |
| $\text{Nb}_3\text{N}_2$        | $\text{Nb}^{3+}$           | 1   | -0.86                  | -0.86                        |
| $\text{V}_3\text{N}_2$         | $\text{V}^{2+}$            | 0   | 0.26                   | —                            |
|                                | $\text{V}^{3+}$            | 1   | 0.00                   | 0.00                         |
|                                | $\text{VOH}^{2+}$          | 1   | 0.18                   | 0.18                         |
|                                | $\text{VO}^{2+}$           | 2   | 0.32                   | 0.16                         |
|                                | $\text{VO}_2^+$            | 3   | 1.32                   | 0.44                         |
|                                | $\text{VO}(\text{OH})^+$   | 2   | 0.64                   | 0.32                         |
| $\text{W}_3\text{N}_2$         | $\text{WO}_{3(\text{aq})}$ | 4   | -0.36                  | -0.09                        |
| $\text{Zr}_3\text{N}_2$        | $\text{Zr}^{4+}$           | 2   | -2.96                  | -1.48                        |

**Table S19.** Summary of the thermodynamic stability of screened nitrogen doped SAC-like sites on the MXene basal plane,  $3\text{N}^*-\text{M}_{\text{SAC}}-\text{O}$ , of  $\text{M}_3\text{N}_2\text{O}$  MXene ( $\text{M} = \text{Cr}, \text{Hf}, \text{Mo}, \text{Nb}, \text{V}, \text{W}$ , and  $\text{Zr}$ ) in the context of the *b*) OER scenario (*cf.* **Figure S2**) using gas-phase DFT calculations.  $\text{M}^{n+}$  represents different ions resulting from the dissolution of the corresponding metal atom at the SAC site into solution,  $n$  is total number of electron transfers in the overall reaction,  $\Delta G$  is the Gibbs free energy of the dissolution process, and  $U_{\text{diss}}$  denotes the dissolution potential relative to the SHE.

| $\text{M}_3\text{N}_2\text{O}$ | $\text{M}^{n+}$            | $n$ | $\Delta G / \text{eV}$ | $U_{\text{diss}} / \text{V}$ |
|--------------------------------|----------------------------|-----|------------------------|------------------------------|
| $\text{Cr}_3\text{N}_2$        | $\text{Cr}^{2+}$           | 4   | 6.09                   | 1.52                         |
|                                | $\text{Cr}^{3+}$           | 5   | 5.69                   | 1.14                         |
| $\text{Hf}_3\text{N}_2$        | $\text{HfO}(\text{OH})_2$  | 6   | 4.20                   | 0.70                         |
|                                | $\text{HfO}^{2+}$          | 6   | 3.98                   | 0.66                         |
| $\text{Mo}_3\text{N}_2$        | $\text{Mo}^{3+}$           | 5   | 9.69                   | 1.94                         |
| $\text{Nb}_3\text{N}_2$        | $\text{Nb}^{3+}$           | 5   | 5.19                   | 1.04                         |
| $\text{V}_3\text{N}_2$         | $\text{V}^{2+}$            | 4   | 6.01                   | 1.50                         |
|                                | $\text{V}^{3+}$            | 5   | 5.75                   | 1.15                         |
|                                | $\text{VOH}^{2+}$          | 5   | 5.93                   | 1.19                         |
|                                | $\text{VO}^{2+}$           | 6   | 6.07                   | 1.01                         |
|                                | $\text{VO}_2^+$            | 7   | 7.07                   | 1.01                         |
|                                | $\text{VO}(\text{OH})^+$   | 6   | 6.39                   | 1.07                         |
| $\text{W}_3\text{N}_2$         | $\text{WO}_{3(\text{aq})}$ | 8   | 8.30                   | 1.04                         |
| $\text{Zr}_3\text{N}_2$        | $\text{Zr}^{4+}$           | 6   | 4.83                   | 0.81                         |

**Table S20.** Summary of the thermodynamic stability of screened nitrogen doped SAC-like sites on the MXene basal plane,  $3\text{O}^*-\text{M}_{\text{SAC}}-\text{O}^*$ , of  $\text{M}_3\text{N}_2\text{O}$  MXene ( $\text{M} = \text{Cr}, \text{Hf}, \text{Mo}, \text{Nb}, \text{V}, \text{W}, \text{and Zr}$ ) in the context of the *b*) OER scenario (*cf.* **Figure S2**) using gas-phase DFT calculations.  $\text{M}^{n+}$  represents different ions resulting from the dissolution of the corresponding metal atom at the SAC site into solution,  $n$  is total number of electron transfers in the overall reaction,  $\Delta G$  is the Gibbs free energy of the dissolution process, and  $U_{\text{diss}}$  denotes the dissolution potential relative to the SHE.

| $\text{M}_3\text{N}_2\text{O}$ | $\text{M}^{n+}$            | $n$ | $\Delta G / \text{eV}$ | $U_{\text{diss}} / \text{V}$ |
|--------------------------------|----------------------------|-----|------------------------|------------------------------|
| $\text{Cr}_3\text{N}_2$        | $\text{Cr}^{2+}$           | 4   | 6.05                   | 1.51                         |
|                                | $\text{Cr}^{3+}$           | 5   | 5.65                   | 1.13                         |
| $\text{Hf}_3\text{N}_2$        | $\text{HfO}(\text{OH})_2$  | 6   | 0.46                   | 0.08                         |
|                                | $\text{HfO}^{2+}$          | 6   | 0.24                   | 0.04                         |
| $\text{Mo}_3\text{N}_2$        | $\text{Mo}^{3+}$           | 5   | 6.85                   | 1.37                         |
| $\text{Nb}_3\text{N}_2$        | $\text{Nb}^{3+}$           | 5   | 4.05                   | 0.81                         |
| $\text{V}_3\text{N}_2$         | $\text{V}^{2+}$            | 4   | 5.18                   | 1.29                         |
|                                | $\text{V}^{3+}$            | 5   | 4.92                   | 0.98                         |
|                                | $\text{VOH}^{2+}$          | 5   | 5.10                   | 1.02                         |
|                                | $\text{VO}^{2+}$           | 6   | 5.24                   | 0.87                         |
|                                | $\text{VO}_2^+$            | 7   | 6.24                   | 0.89                         |
|                                | $\text{VO}(\text{OH})^+$   | 6   | 5.56                   | 0.93                         |
| $\text{W}_3\text{N}_2$         | $\text{WO}_{3(\text{aq})}$ | 8   | 4.56                   | 0.57                         |
| $\text{Zr}_3\text{N}_2$        | $\text{Zr}^{4+}$           | 6   | 1.95                   | 0.33                         |

**Table S21.** Summary of the thermodynamic stability of screened nitrogen doped SAC-like sites on the MXene basal plane,  $3\text{N}^*-\text{M}_{\text{SAC}}-\text{O}$ , of  $\text{M}_4\text{C}_3\text{O}$  MXene ( $\text{M} = \text{Mo}, \text{Nb}, \text{Ta}$  and  $\text{W}$ ) in the context of the *a*) pre-OER scenario (*cf.* **Figure S1**) using gas-phase DFT calculations.  $\text{M}^{n+}$  represents different ions resulting from the dissolution of the corresponding metal atom at the SAC site into solution,  $n$  is total number of electron transfers in the overall reaction,  $\Delta G$  is the Gibbs free energy of the dissolution process, and  $U_{\text{diss}}$  denotes the dissolution potential relative to the SHE.

| $\text{M}_4\text{C}_3\text{O}$ | $\text{M}^{n+}$            | $n$ | $\Delta G / \text{eV}$ | $U_{\text{diss}} / \text{V}$ |
|--------------------------------|----------------------------|-----|------------------------|------------------------------|
| $\text{Mo}_4\text{C}_3$        | $\text{Mo}^{3+}$           | 1   | 4.49                   | 4.49                         |
| $\text{Nb}_4\text{C}_3$        | $\text{Nb}^{3+}$           | 1   | 1.21                   | 1.21                         |
| $\text{Ta}_4\text{C}_3$        | $\text{Ta}^{3+}$           | 1   | 3.24                   | 3.24                         |
| $\text{W}_4\text{C}_3$         | $\text{WO}_{3(\text{aq})}$ | 4   | 4.37                   | 1.09                         |

**Table S22.** Summary of the thermodynamic stability of screened undoped SAC-like sites on the MXene basal plane,  $3\text{O}^*-\text{M}_{\text{SAC}}-\text{O}^*$ , of  $\text{M}_4\text{C}_3\text{O}$  MXene ( $\text{M} = \text{Mo}, \text{Nb}, \text{Ta}$  and  $\text{W}$ ) in the context of the *a*) pre-OER scenario (*cf.* **Figure S1**) using gas-phase DFT calculations.  $\text{M}^{n+}$  represents different ions resulting from the dissolution of the corresponding metal atom at the SAC site into solution,  $n$  is total number of electron transfers in the overall reaction,  $\Delta G$  is the Gibbs free energy of the dissolution process, and  $U_{\text{diss}}$  denotes the dissolution potential relative to the SHE.

| $\text{M}_4\text{C}_3\text{O}$ | $\text{M}^{n+}$            | $n$ | $\Delta G / \text{eV}$ | $U_{\text{diss}} / \text{V}$ |
|--------------------------------|----------------------------|-----|------------------------|------------------------------|
| $\text{Mo}_4\text{C}_3$        | $\text{Mo}^{3+}$           | 1   | 3.04                   | 3.04                         |
| $\text{Nb}_4\text{C}_3$        | $\text{Nb}^{3+}$           | 1   | 0.07                   | 0.07                         |
| $\text{Ta}_4\text{C}_3$        | $\text{Ta}^{3+}$           | 1   | 1.21                   | 1.21                         |
| $\text{W}_4\text{C}_3$         | $\text{WO}_{3(\text{aq})}$ | 4   | 1.26                   | 0.31                         |



**Table S23.** Summary of the thermodynamic stability of screened nitrogen doped SAC-like sites on the MXene basal plane,  $3\text{N}^*-\text{M}_{\text{SAC}}-\text{O}$ , of  $\text{M}_4\text{C}_3\text{O}$  MXene ( $\text{M} = \text{Mo}, \text{Nb}, \text{Ta}$  and  $\text{W}$ ) in the context of the *b*) OER scenario (*cf.* **Figure S2**) using gas-phase DFT calculations.  $\text{M}^{n+}$  represents different ions resulting from the dissolution of the corresponding metal atom at the SAC site into solution,  $n$  is total number of electron transfers in the overall reaction,  $\Delta G$  is the Gibbs free energy of the dissolution process, and  $U_{\text{diss}}$  denotes the dissolution potential relative to the SHE.

| $\text{M}_4\text{C}_3\text{O}$ | $\text{M}^{n+}$            | $n$ | $\Delta G / \text{eV}$ | $U_{\text{diss}} / \text{V}$ |
|--------------------------------|----------------------------|-----|------------------------|------------------------------|
| $\text{Mo}_4\text{C}_3$        | $\text{Mo}^{3+}$           | 5   | 9.41                   | 1.88                         |
| $\text{Nb}_4\text{C}_3$        | $\text{Nb}^{3+}$           | 5   | 6.13                   | 1.23                         |
| $\text{Ta}_4\text{C}_3$        | $\text{Ta}^{3+}$           | 5   | 8.15                   | 1.63                         |
| $\text{W}_4\text{C}_3$         | $\text{WO}_{3(\text{aq})}$ | 8   | 9.29                   | 1.16                         |

**Table S24.** Summary of the thermodynamic stability of screened undoped SAC-like sites on the MXene basal plane,  $3\text{O}^*-\text{M}_{\text{SAC}}-\text{O}^*$ , of  $\text{M}_4\text{C}_3\text{O}$  MXene ( $\text{M} = \text{Mo}, \text{Nb}, \text{Ta}$  and  $\text{W}$ ) in the context of the *b*) OER scenario (*cf.* **Figure S2**) using gas-phase DFT calculations.  $\text{M}^{n+}$  represents different ions resulting from the dissolution of the corresponding metal atom at the SAC site into solution,  $n$  is total number of electron transfers in the overall reaction,  $\Delta G$  is the Gibbs free energy of the dissolution process, and  $U_{\text{diss}}$  denotes the dissolution potential relative to the SHE.

| $\text{M}_4\text{C}_3\text{O}$ | $\text{M}^{n+}$            | $n$ | $\Delta G / \text{eV}$ | $U_{\text{diss}} / \text{V}$ |
|--------------------------------|----------------------------|-----|------------------------|------------------------------|
| $\text{Mo}_4\text{C}_3$        | $\text{Mo}^{3+}$           | 5   | 7.96                   | 1.59                         |
| $\text{Nb}_4\text{C}_3$        | $\text{Nb}^{3+}$           | 5   | 4.99                   | 1.00                         |
| $\text{Ta}_4\text{C}_3$        | $\text{Ta}^{3+}$           | 5   | 6.13                   | 1.23                         |
| $\text{W}_4\text{C}_3$         | $\text{WO}_{3(\text{aq})}$ | 8   | 6.18                   | 0.77                         |

**Table S25.** Summary of the thermodynamic stability of screened nitrogen doped SAC-like sites on the MXene basal plane,  $3\text{N}^*-\text{M}_{\text{SAC}}-\text{O}$ , of  $\text{M}_4\text{N}_3\text{O}$  MXene ( $\text{M} = \text{Cr}, \text{Mo}, \text{Nb}, \text{Ta}, \text{V}$  and  $\text{W}$ ) in the context of the *a*) pre-OER scenario (*cf.* **Figure S1**) using gas-phase DFT calculations.  $\text{M}^{n+}$  represents different ions resulting from the dissolution of the corresponding metal atom at the SAC site into solution,  $n$  is total number of electron transfers in the overall reaction,  $\Delta G$  is the Gibbs free energy of the dissolution process, and  $U_{\text{diss}}$  denotes the dissolution potential relative to the SHE.

| $\text{M}_4\text{N}_3\text{O}$ | $\text{M}^{n+}$            | $n$ | $\Delta G / \text{eV}$ | $U_{\text{diss}} / \text{V}$ |
|--------------------------------|----------------------------|-----|------------------------|------------------------------|
| $\text{Cr}_4\text{N}_3$        | $\text{Cr}^{2+}$           | 0   | 1.81                   | —                            |
|                                | $\text{Cr}^{3+}$           | 1   | 1.41                   | 1.41                         |
| $\text{Mo}_4\text{N}_3$        | $\text{Mo}^{3+}$           | 1   | 4.97                   | 4.97                         |
| $\text{Nb}_4\text{N}_3$        | $\text{Nb}^{3+}$           | 1   | 0.14                   | 0.14                         |
| $\text{Ta}_4\text{N}_3$        | $\text{Ta}^{3+}$           | 1   | 1.85                   | 1.85                         |
| $\text{V}_4\text{N}_3$         | $\text{V}^{2+}$            | 0   | 1.18                   | 1.18                         |
|                                | $\text{V}^{3+}$            | 1   | 0.92                   | 0.92                         |
|                                | $\text{VOH}^{2+}$          | 1   | 1.10                   | 1.10                         |
|                                | $\text{VO}^{2+}$           | 2   | 1.24                   | 0.62                         |
|                                | $\text{VO}_2^+$            | 3   | 2.24                   | 0.75                         |
|                                | $\text{VO}(\text{OH})^+$   | 2   | 1.56                   | 0.78                         |
| $\text{W}_4\text{N}_3$         | $\text{WO}_{3(\text{aq})}$ | 4   | 3.54                   | 0.89                         |

**Table S26.** Summary of the thermodynamic stability of screened undoped SAC-like sites on the MXene basal plane,  $3\text{O}^*-\text{M}_{\text{SAC}}-\text{O}$ , of  $\text{M}_4\text{N}_3\text{O}$  MXene ( $\text{M} = \text{Cr}, \text{Mo}, \text{Nb}, \text{Ta}, \text{V}$  and  $\text{W}$ ) in the context of the *a*) pre-OER scenario (*cf.* **Figure S1**) using gas-phase DFT calculations.  $\text{M}^{n+}$  represents different ions resulting from the dissolution of the corresponding metal atom at the SAC site into solution,  $n$  is total number of electron transfers in the overall reaction,  $\Delta G$  is the Gibbs free energy of the dissolution process, and  $U_{\text{diss}}$  denotes the dissolution potential relative to the SHE.

| $\text{M}_4\text{N}_3\text{O}$ | $\text{M}^{n+}$            | $n$ | $\Delta G / \text{eV}$ | $U_{\text{diss}} / \text{V}$ |
|--------------------------------|----------------------------|-----|------------------------|------------------------------|
| $\text{Cr}_4\text{N}_3$        | $\text{Cr}^{2+}$           | 0   | 1.95                   | —                            |
|                                | $\text{Cr}^{3+}$           | 1   | 1.55                   | 1.55                         |
| $\text{Mo}_4\text{N}_3$        | $\text{Mo}^{3+}$           | 1   | 2.04                   | 2.04                         |
| $\text{Nb}_4\text{N}_3$        | $\text{Nb}^{3+}$           | 1   | -1.25                  | -1.25                        |
| $\text{Ta}_4\text{N}_3$        | $\text{Ta}^{3+}$           | 1   | 0.15                   | 0.15                         |
| $\text{V}_4\text{N}_3$         | $\text{V}^{2+}$            | 0   | 0.44                   | —                            |
|                                | $\text{V}^{3+}$            | 1   | 0.18                   | 0.18                         |
|                                | $\text{VOH}^{2+}$          | 1   | 0.36                   | 0.36                         |
|                                | $\text{VO}^{2+}$           | 2   | 0.50                   | 0.25                         |
|                                | $\text{VO}_2^+$            | 3   | 1.50                   | 0.50                         |
|                                | $\text{VO}(\text{OH})^+$   | 2   | 0.82                   | 0.41                         |
| $\text{W}_4\text{N}_3$         | $\text{WO}_{3(\text{aq})}$ | 4   | -0.39                  | -0.10                        |

**Table S27.** Summary of the thermodynamic stability of screened nitrogen doped SAC-like sites on the MXene basal plane,  $3\text{N}^*\text{-M}_{\text{SAC}}\text{-*O}$ , of  $\text{M}_4\text{N}_3\text{O}$  MXene ( $\text{M} = \text{Cr}, \text{Mo}, \text{Nb}, \text{Ta}, \text{V}$  and  $\text{W}$ ) in the context of the *b*) OER scenario (*cf.* **Figure S2**) using gas-phase DFT calculations.  $\text{M}^{n+}$  represents different ions resulting from the dissolution of the corresponding metal atom at the SAC site into solution,  $n$  is total number of electron transfers in the overall reaction,  $\Delta G$  is the Gibbs free energy of the dissolution process, and  $U_{\text{diss}}$  denotes the dissolution potential relative to the SHE.

| $\text{M}_4\text{N}_3\text{O}$ | $\text{M}^{n+}$            | $n$ | $\Delta G / \text{eV}$ | $U_{\text{diss}} / \text{V}$ |
|--------------------------------|----------------------------|-----|------------------------|------------------------------|
| $\text{Cr}_4\text{N}_3$        | $\text{Cr}^{2+}$           | 4   | 6.73                   | 1.68                         |
|                                | $\text{Cr}^{3+}$           | 5   | 6.33                   | 1.27                         |
| $\text{Mo}_4\text{N}_3$        | $\text{Mo}^{3+}$           | 5   | 9.89                   | 1.98                         |
| $\text{Nb}_4\text{N}_3$        | $\text{Nb}^{3+}$           | 5   | 5.05                   | 1.01                         |
| $\text{Ta}_4\text{N}_3$        | $\text{Ta}^{3+}$           | 5   | 6.77                   | 1.35                         |
| $\text{V}_4\text{N}_3$         | $\text{V}^{2+}$            | 4   | 6.10                   | 1.53                         |
|                                | $\text{V}^{3+}$            | 5   | 5.84                   | 1.17                         |
|                                | $\text{VOH}^{2+}$          | 5   | 6.02                   | 1.20                         |
|                                | $\text{VO}^{2+}$           | 6   | 6.16                   | 1.03                         |
|                                | $\text{VO}_2^+$            | 7   | 7.16                   | 1.02                         |
|                                | $\text{VO(OH)}^+$          | 6   | 6.48                   | 1.08                         |
| $\text{W}_4\text{N}_3$         | $\text{WO}_{3(\text{aq})}$ | 8   | 8.46                   | 1.06                         |

**Table S28.** Summary of the thermodynamic stability of screened undoped SAC-like sites on the MXene basal plane,  $3\text{O}^*-\text{M}_{\text{SAC}}-\text{O}$ , of  $\text{M}_4\text{N}_3\text{O}$  MXene ( $\text{M} = \text{Cr}, \text{Mo}, \text{Nb}, \text{Ta}, \text{V}$  and  $\text{W}$ ) in the context of the *b*) OER scenario (*cf.* **Figure S2**) using gas-phase DFT calculations.  $\text{M}^{n+}$  represents different ions resulting from the dissolution of the corresponding metal atom at the SAC site into solution,  $n$  is total number of electron transfers in the overall reaction,  $\Delta G$  is the Gibbs free energy of the dissolution process, and  $U_{\text{diss}}$  denotes the dissolution potential relative to the SHE.

| $\text{M}_4\text{N}_3\text{O}$ | $\text{M}^{n+}$            | $n$ | $\Delta G / \text{eV}$ | $U_{\text{diss}} / \text{V}$ |
|--------------------------------|----------------------------|-----|------------------------|------------------------------|
| $\text{Cr}_4\text{N}_3$        | $\text{Cr}^{2+}$           | 4   | 6.87                   | —                            |
|                                | $\text{Cr}^{3+}$           | 5   | 6.47                   | 1.29                         |
| $\text{Mo}_4\text{N}_3$        | $\text{Mo}^{3+}$           | 5   | 6.95                   | 1.39                         |
| $\text{Nb}_4\text{N}_3$        | $\text{Nb}^{3+}$           | 5   | 3.67                   | 0.73                         |
| $\text{Ta}_4\text{N}_3$        | $\text{Ta}^{3+}$           | 5   | 5.06                   | 1.01                         |
| $\text{V}_4\text{N}_3$         | $\text{V}^{2+}$            | 4   | 5.36                   | 1.34                         |
|                                | $\text{V}^{3+}$            | 5   | 5.10                   | 1.02                         |
|                                | $\text{VOH}^{2+}$          | 5   | 5.28                   | 1.06                         |
|                                | $\text{VO}^{2+}$           | 6   | 5.42                   | 0.90                         |
|                                | $\text{VO}_2^+$            | 7   | 6.42                   | 0.92                         |
|                                | $\text{VO}(\text{OH})^+$   | 6   | 5.74                   | 0.96                         |
| $\text{W}_4\text{N}_3$         | $\text{WO}_{3(\text{aq})}$ | 8   | 4.52                   | 0.57                         |

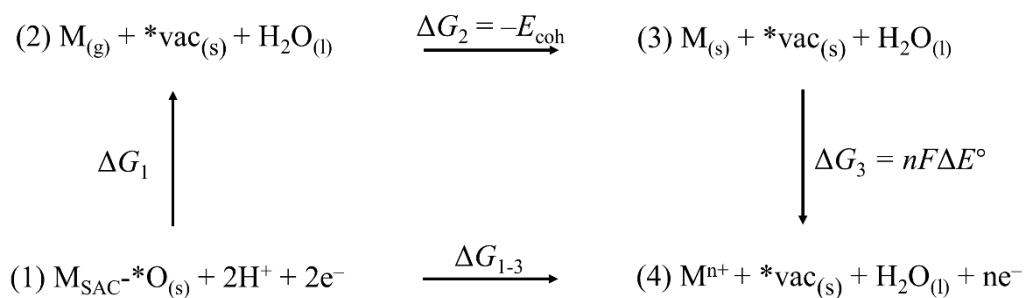

**Figure S1.** Thermodynamic cycle to determine the Gibbs free energy of the dissolution process of  $\text{M}_{\text{SAC}}-*\text{O}$  in the case that no oxygen is formed. Reproduced with permission from Ref. [1]

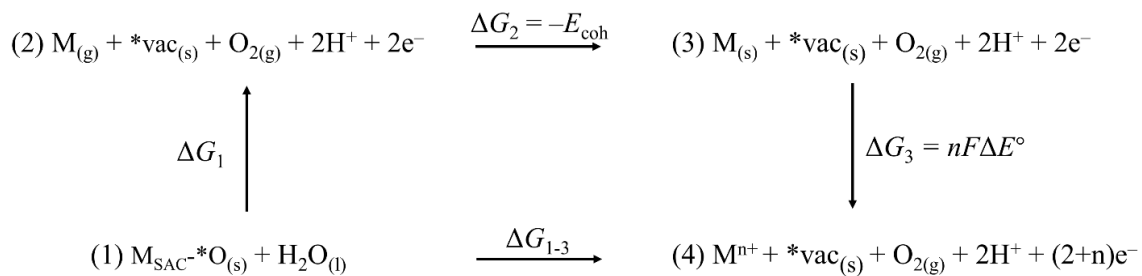

**Figure S2.** Thermodynamic cycle to determine the Gibbs free energy of the dissolution process of  $\text{M}_{\text{SAC}}-*\text{O}$  in the case that oxygen is formed. Reproduced with permission from Ref. [1]

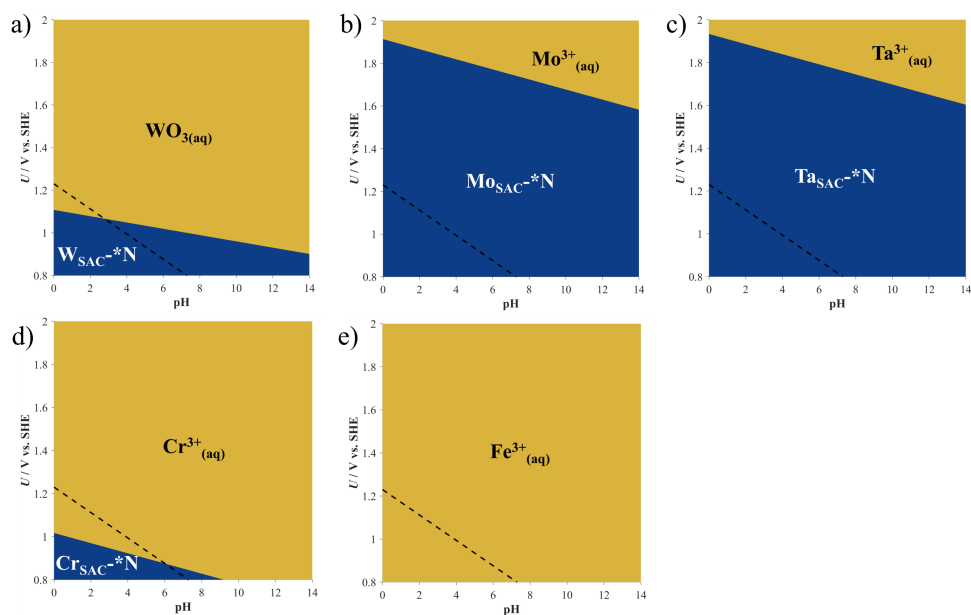

**Figure S3.** Pourbaix diagrams assessing the thermodynamic stability of SAC-like sites on the MXene basal plane,  $3N^*-M_{SAC}^*O$ , of a)  $W_2C_1O$ , b)  $Mo_2C_1O$ , c)  $Ta_2C_1O$ , d)  $Cr_2C_1O$  and e)  $Fe_2C_1O$  MXenes in the context of the OER scenario (*cf.* **Figure S2**). The stability of  $M_{SAC}$  is referenced to different oxidative ion states resulting from the dissolution of the corresponding metals (*cf.* **Table S4** in the SI). Regions where  $3N^*-M_{SAC}^*O$  is thermodynamically stable are colored blue, while a yellow background indicates that metal cations are energetically favored. The black, dashed line indicates the OER equilibrium potential on the SHE scale.

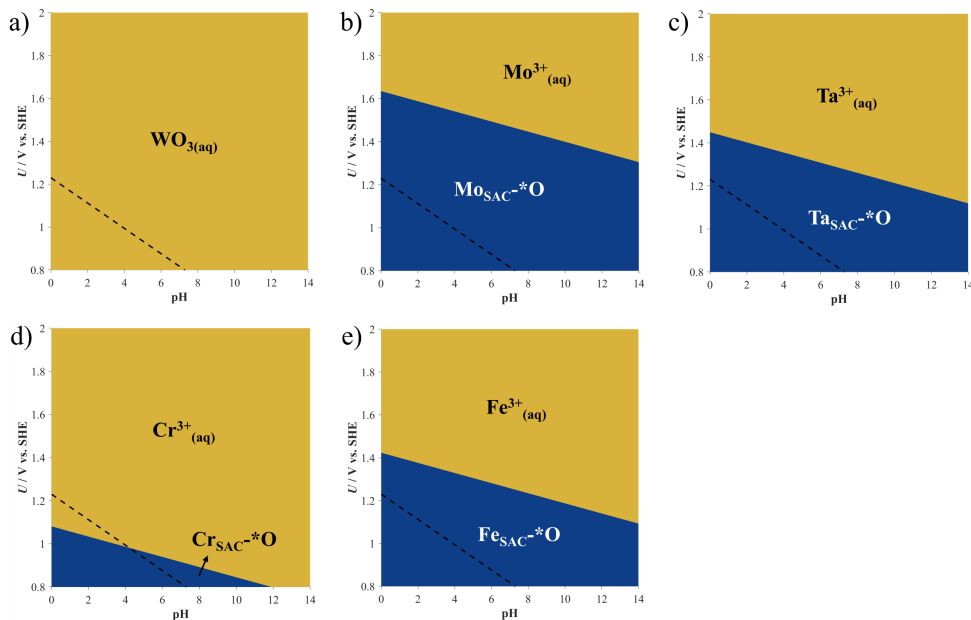

**Figure S4.** Pourbaix diagrams assessing the thermodynamic stability of SAC-like sites on the MXene basal plane,  $3O^*-M_{SAC}^*O$ , of a)  $W_2C_1O$ , b)  $Mo_2C_1O$ , c)  $Ta_2C_1O$ , d)  $Cr_2C_1O$  and e)  $Fe_2C_1O$  MXenes in the context of the OER scenario (*cf.* **Figure S2**). The stability of  $M_{SAC}$  is referenced to different oxidative ion states resulting from the dissolution of the corresponding metals (*cf.* **Table S4** in the SI). Regions where  $3O^*-M_{SAC}^*O$  is thermodynamically stable are colored blue, while a yellow background indicates that metal cations are energetically favored. The black, dashed line indicates the OER equilibrium potential on the SHE scale.



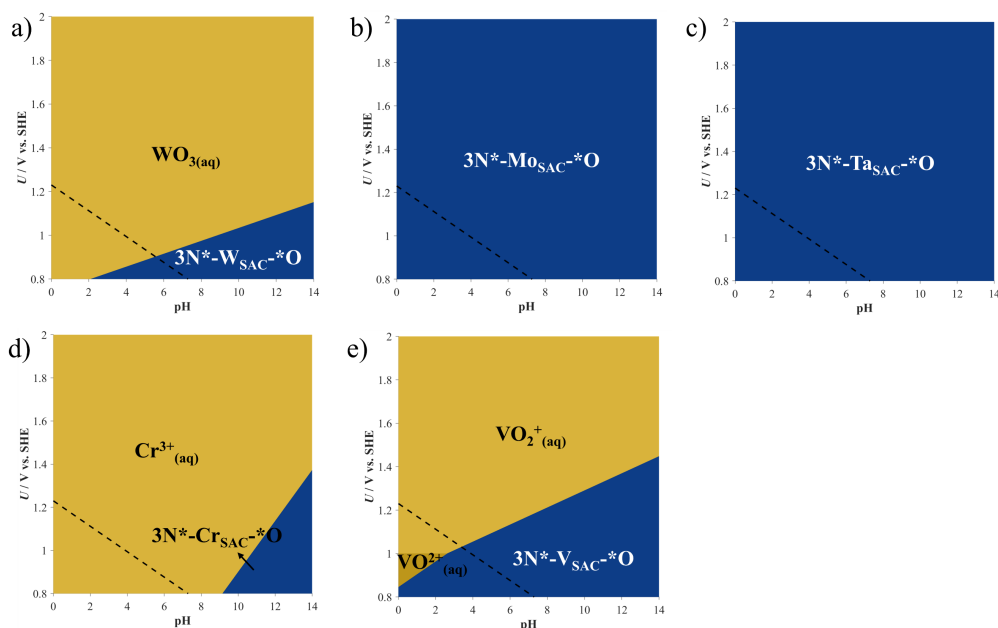

**Figure S5.** Pourbaix diagrams assessing the thermodynamic stability of SAC-like sites on the MXene basal plane,  $3N^*-M_{SAC}^-*O$ , of a)  $W_2N_1O$ , b)  $Mo_2N_1O$ , c)  $Ta_2N_1O$ , d)  $Cr_2N_1O$  and e)  $V_2N_1O$  MXenes in the context of the pre-OER scenario (*cf.* **Figure S1**). The stability of  $M_{SAC}$  is referenced to different oxidative ion states resulting from the dissolution of the corresponding metals (*cf.* **Table S4** in the SI). Regions where  $3N^*-M_{SAC}^-*O$  is thermodynamically stable are colored blue, while a yellow background indicates that metal cations are energetically favored. The black, dashed line indicates the OER equilibrium potential on the SHE scale.

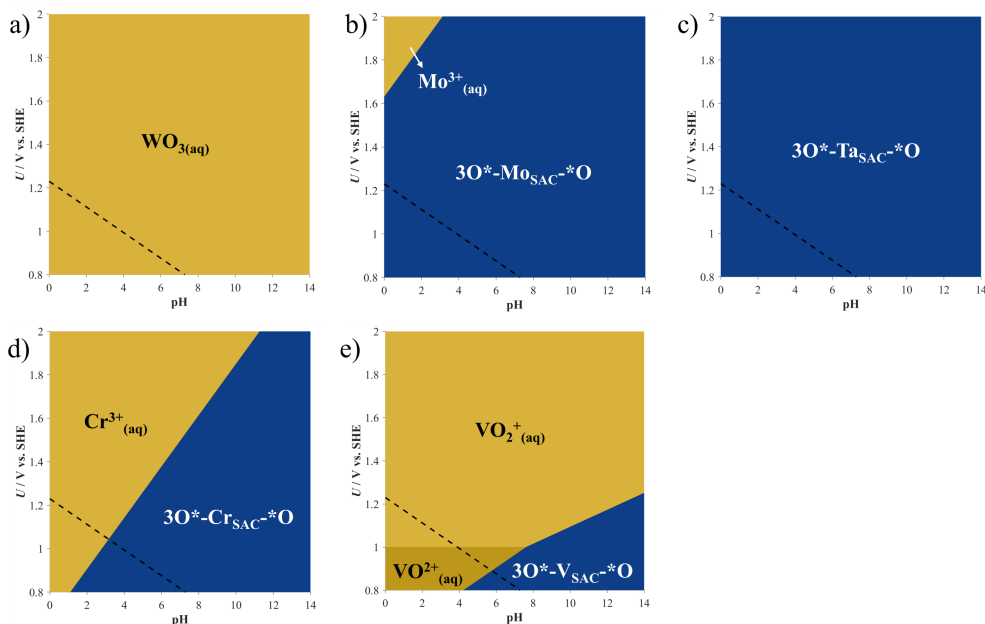

**Figure S6.** Pourbaix diagrams assessing the thermodynamic stability of SAC-like sites on the MXene basal plane,  $3O^*-M_{SAC}^-*O$ , of a)  $W_2N_1O$ , b)  $Mo_2N_1O$ , c)  $Ta_2N_1O$ , d)  $Cr_2N_1O$  and e)  $V_2N_1O$  MXenes in the context of the pre-OER scenario (*cf.* **Figure S1**). The stability of  $M_{SAC}$  is referenced to different oxidative ion states resulting from the dissolution of the corresponding metals (*cf.* **Table S4** in the SI). Regions where  $3O^*-M_{SAC}^-*O$  is thermodynamically stable are colored blue, while a yellow background indicates that metal cations are energetically favored. The black, dashed line indicates the OER equilibrium potential on the SHE scale.

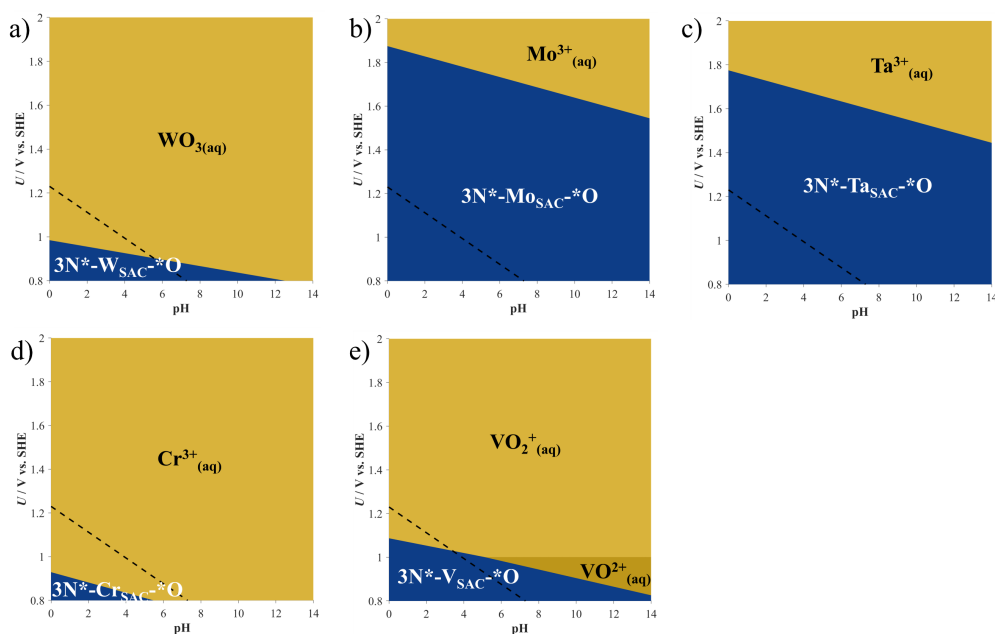

**Figure S7.** Pourbaix diagrams assessing the thermodynamic stability of SAC-like sites on the MXene basal plane,  $3N^*-M_{SAC}-*O$ , of a)  $W_2N_1O$ , b)  $Mo_2N_1O$ , c)  $Ta_2N_1O$ , d)  $Cr_2N_1O$  and e)  $V_2N_1O$  MXenes in the context of the OER scenario (*cf.* **Figure S2**). The stability of  $M_{SAC}$  is referenced to different oxidative ion states resulting from the dissolution of the corresponding metals (*cf.* **Table S4** in the SI). Regions where  $3N^*-M_{SAC}-*O$  is thermodynamically stable are colored blue, while a yellow background indicates that metal cations are energetically favored. The black, dashed line indicates the OER equilibrium potential on the SHE scale.

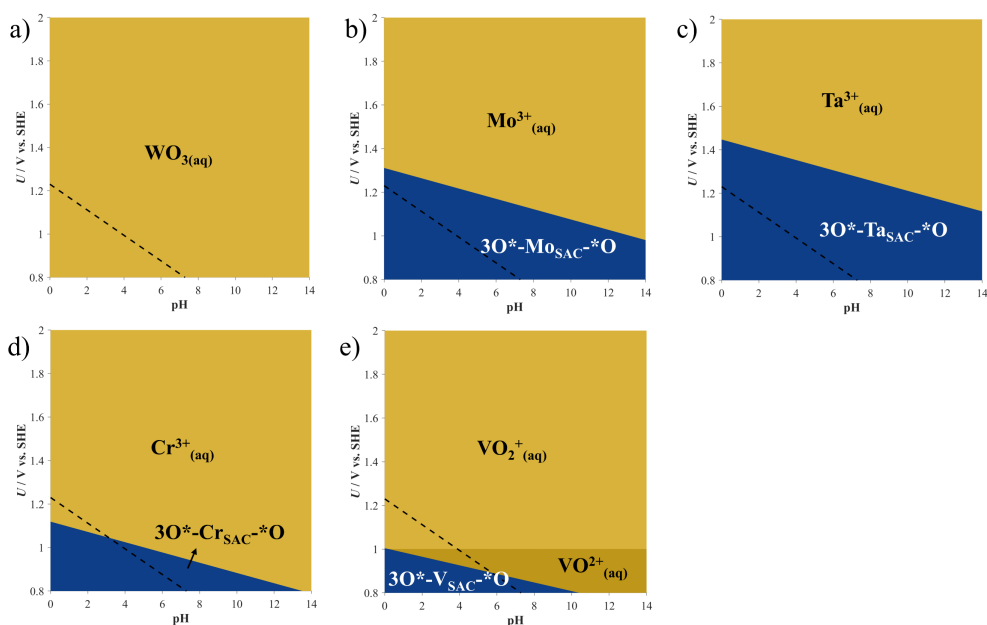

**Figure S8.** Pourbaix diagrams assessing the thermodynamic stability of SAC-like sites on the MXene basal plane,  $3O^*-M_{SAC}-*O$ , of a)  $W_2N_1O$ , b)  $Mo_2N_1O$ , c)  $Ta_2N_1O$ , d)  $Cr_2N_1O$  and e)  $V_2N_1O$  MXenes in the context of the OER scenario (*cf.* **Figure S2**). The stability of  $M_{SAC}$  is referenced to different oxidative ion states resulting from the dissolution of the corresponding metals (*cf.* **Table S4** in the SI). Regions where  $3O^*-M_{SAC}-*O$  is thermodynamically stable are colored blue, while a yellow background indicates that metal cations are energetically favored. The black, dashed line indicates the OER equilibrium potential on the SHE scale.

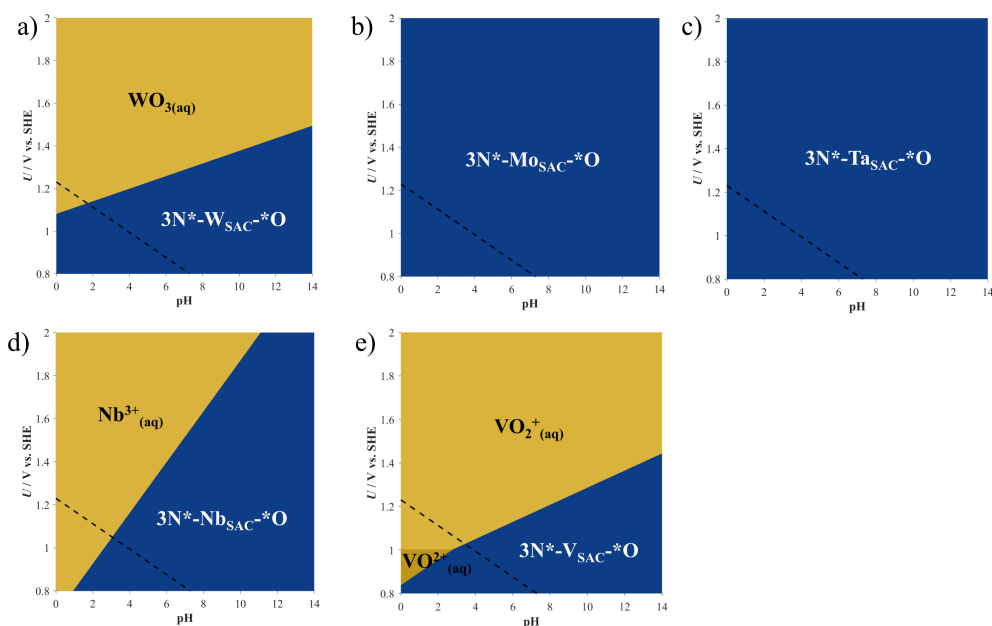

**Figure S9.** Pourbaix diagrams assessing the thermodynamic stability of SAC-like sites on the MXene basal plane,  $3N^*-M_{SAC}-*O$ , of a)  $W_3C_2O$ , b)  $Mo_3C_2O$ , c)  $Ta_3C_2O$ , d)  $Nb_3C_2O$  and e)  $V_3C_2O$  MXenes in the context of the pre-OER scenario (*cf.* **Figure S1**). The stability of  $M_{SAC}$  is referenced to different oxidative ion states resulting from the dissolution of the corresponding metals (*cf.* **Table S4** in the SI). Regions where  $3N^*-M_{SAC}-*O$  is thermodynamically stable are colored blue, while a yellow background indicates that metal cations are energetically favored. The black, dashed line indicates the OER equilibrium potential on the SHE scale.

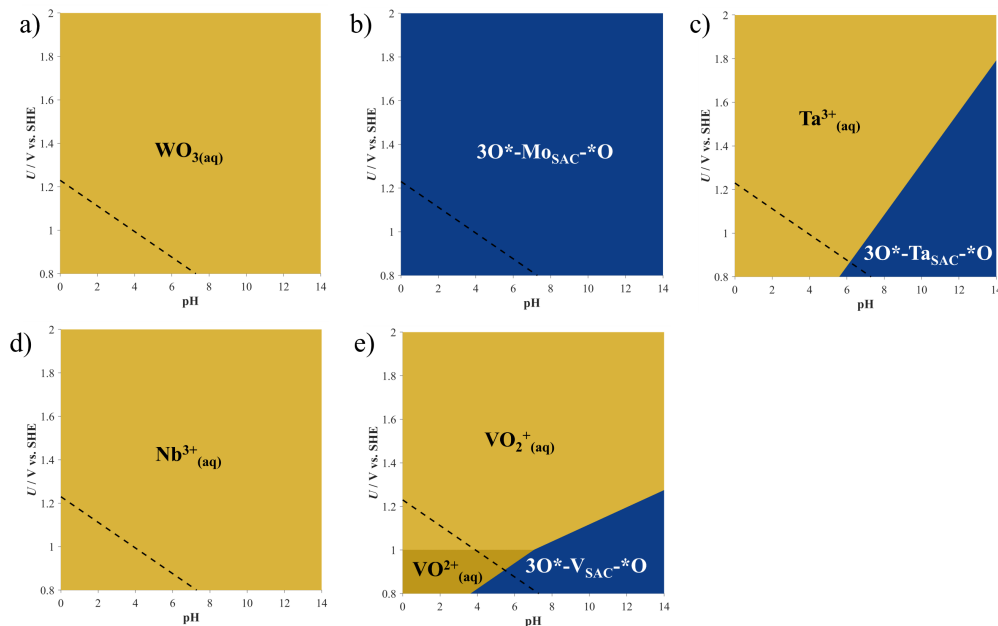

**Figure S10.** Pourbaix diagrams assessing the thermodynamic stability of SAC-like sites on the MXene basal plane,  $3O^*-M_{SAC}-*O$ , of a)  $W_3C_2O$ , b)  $Mo_3C_2O$ , c)  $Ta_3C_2O$ , d)  $Nb_3C_2O$  and e)  $V_3C_2O$  MXenes in the context of the pre-OER scenario (*cf.* **Figure S1**). The stability of  $M_{SAC}$  is referenced to different oxidative ion states resulting from the dissolution of the corresponding metals (*cf.* **Table S4** in the SI). Regions where  $3O^*-M_{SAC}-*O$  is thermodynamically stable are colored blue, while a yellow background indicates that metal cations are energetically favored. The black, dashed line indicates the OER equilibrium potential on the SHE scale.

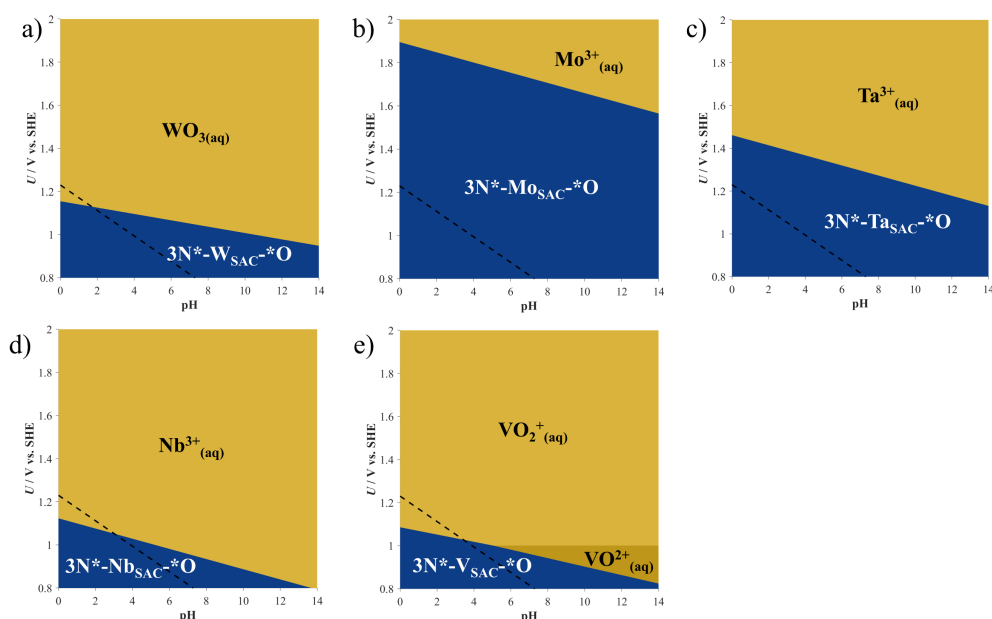

**Figure S11.** Pourbaix diagrams assessing the thermodynamic stability of SAC-like sites on the MXene basal plane,  $3N^*-M_{SAC}-*O$ , of a)  $W_3C_2O$ , b)  $Mo_3C_2O$ , c)  $Ta_3C_2O$ , d)  $Nb_3C_2O$  and e)  $V_3C_2O$  MXenes in the context of the OER scenario (*cf.* Figure S2). The stability of  $M_{SAC}$  is referenced to different oxidative ion states resulting from the dissolution of the corresponding metals (*cf.* Table S4 in the SI). Regions where  $3N^*-M_{SAC}-*O$  is thermodynamically stable are colored blue, while a yellow background indicates that metal cations are energetically favored. The black, dashed line indicates the OER equilibrium potential on the SHE scale.

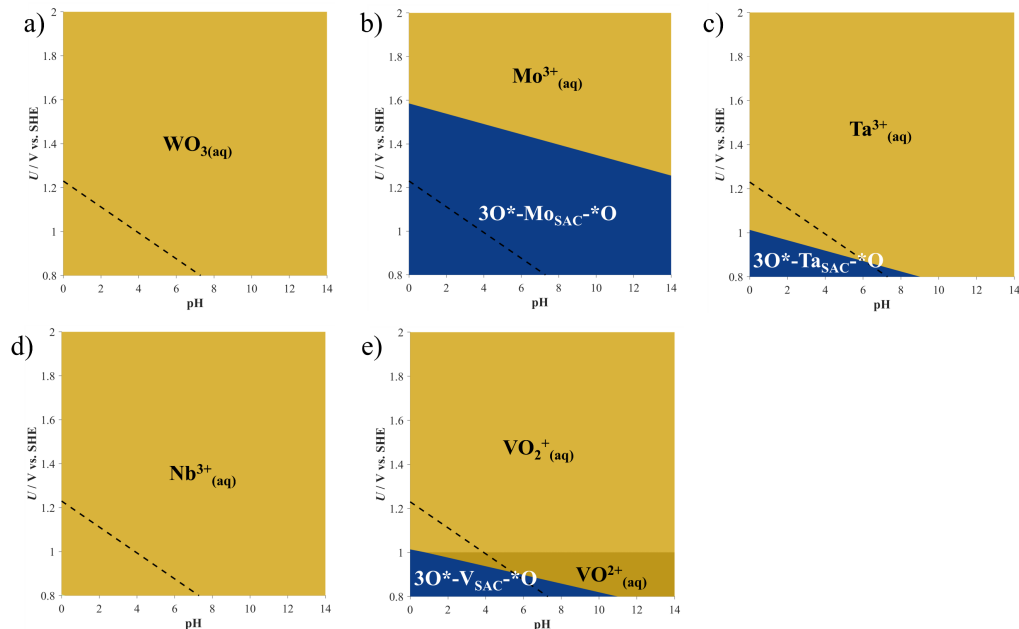

**Figure S12.** Pourbaix diagrams assessing the thermodynamic stability of SAC-like sites on the MXene basal plane,  $3O^*-M_{SAC}-*O$ , of a)  $W_3C_2O$ , b)  $Mo_3C_2O$ , c)  $Ta_3C_2O$ , d)  $Nb_3C_2O$  and e)  $V_3C_2O$  MXenes in the context of the OER scenario (*cf.* Figure S2). The stability of  $M_{SAC}$  is referenced to different oxidative ion states resulting from the dissolution of the corresponding metals (*cf.* Table S4 in the SI). Regions where  $3O^*-M_{SAC}-*O$  is thermodynamically stable are colored blue, while a yellow background indicates that metal cations are energetically favored. The black, dashed line indicates the OER equilibrium potential on the SHE scale.

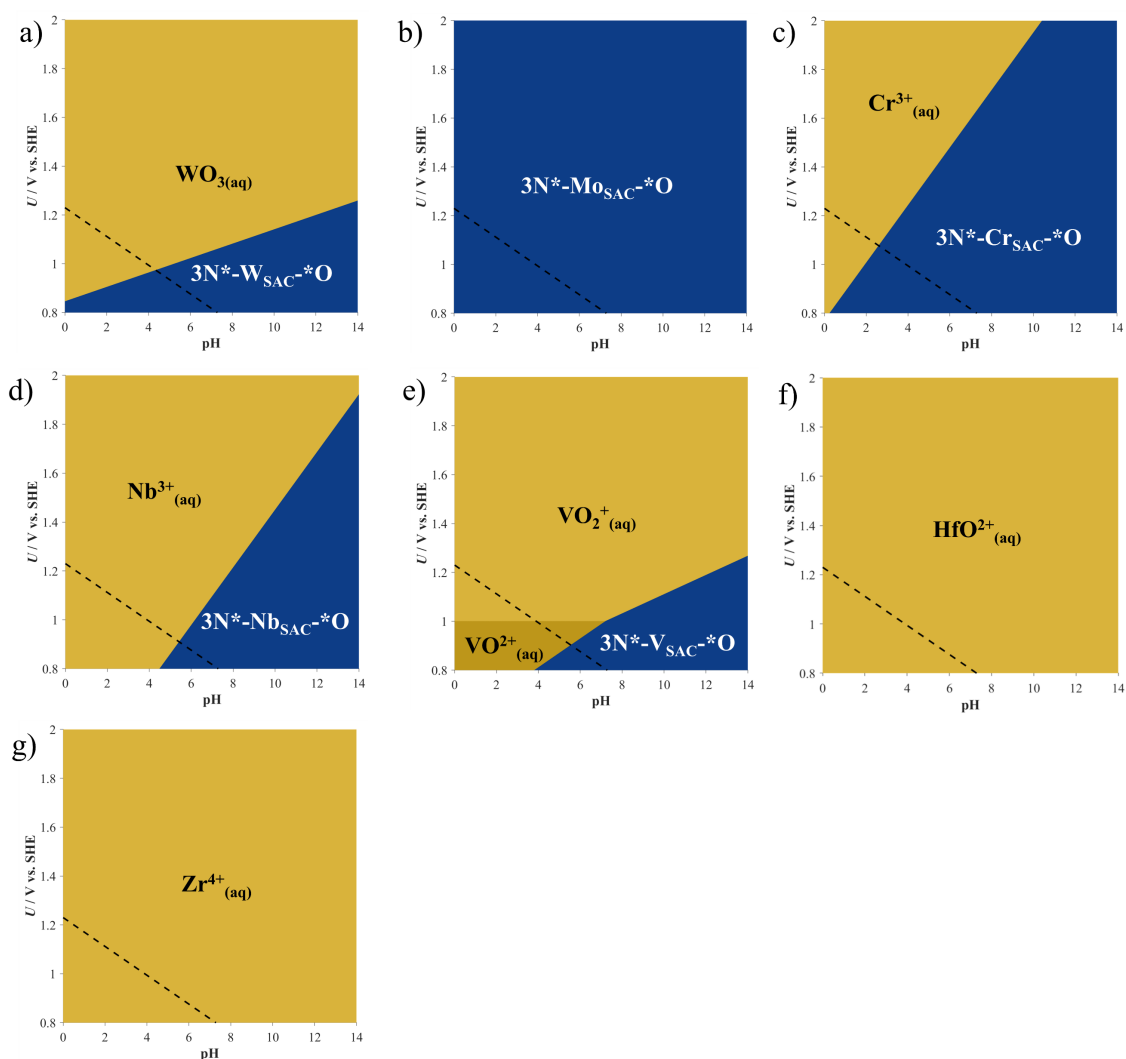

**Figure S13.** Pourbaix diagrams assessing the thermodynamic stability of SAC-like sites on the MXene basal plane,  $3\text{N}^*-\text{M}_{\text{SAC}}-\text{O}$ , of a)  $\text{W}_3\text{N}_2\text{O}$ , b)  $\text{Mo}_3\text{N}_2\text{O}$ , c)  $\text{Cr}_3\text{N}_2\text{O}$ , d)  $\text{Nb}_3\text{N}_2\text{O}$ , e)  $\text{V}_3\text{N}_2\text{O}$ , f)  $\text{Hf}_3\text{N}_2\text{O}$  and g)  $\text{Zr}_3\text{N}_2\text{O}$  MXenes in the context of the pre-OER scenario (*cf.* **Figure S1**). The stability of  $\text{M}_{\text{SAC}}$  is referenced to different oxidative ion states resulting from the dissolution of the corresponding metals (*cf.* **Table S4** in the SI). Regions where  $3\text{N}^*-\text{M}_{\text{SAC}}-\text{O}$  is thermodynamically stable are colored blue, while a yellow background indicates that metal cations are energetically favored. The black, dashed line indicates the OER equilibrium potential on the SHE scale.

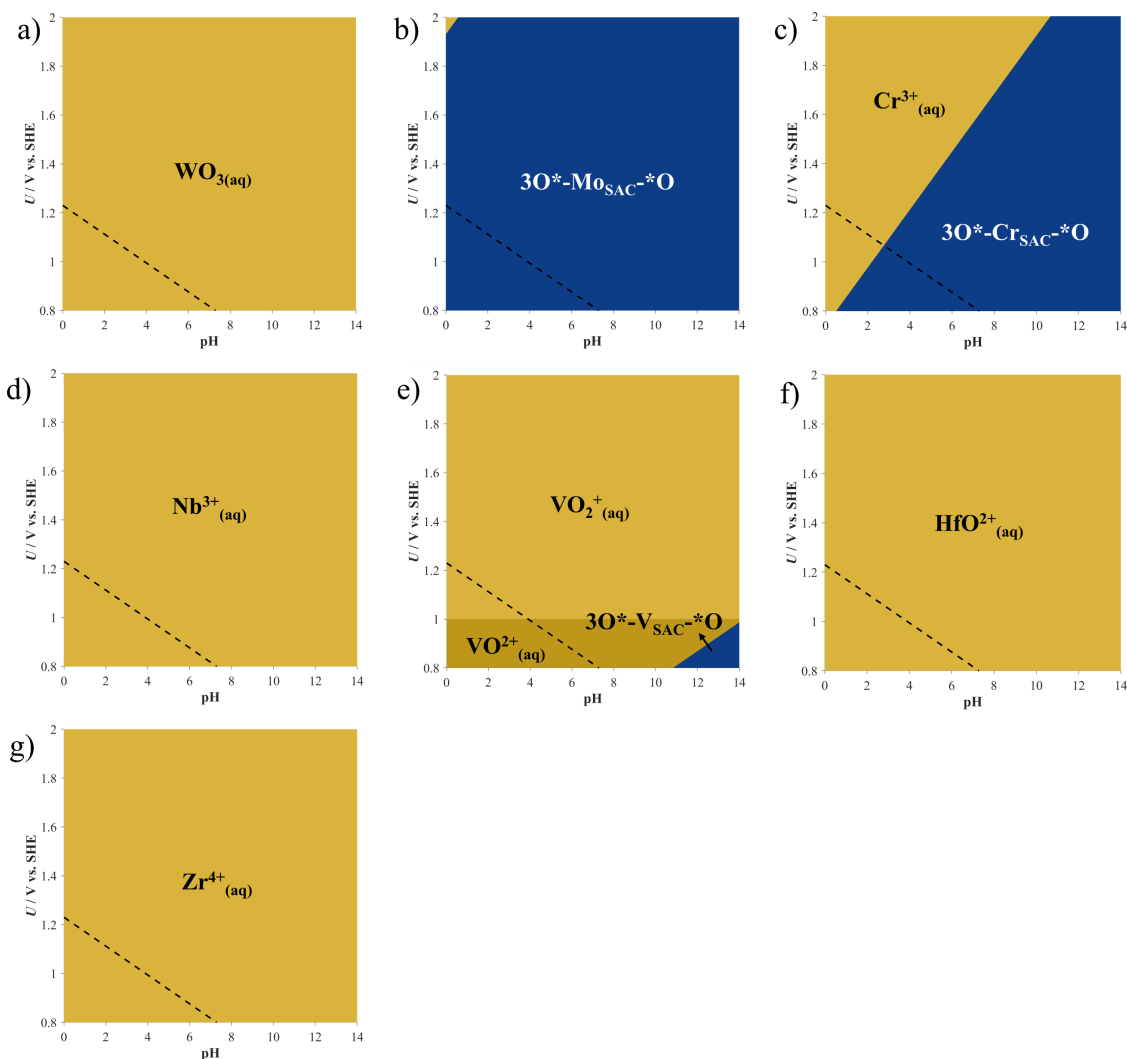

**Figure S14.** Pourbaix diagrams assessing the thermodynamic stability of SAC-like sites on the MXene basal plane,  $3\text{O}^*-\text{M}_{\text{SAC}}-\text{O}$ , of a)  $\text{W}_3\text{N}_2\text{O}$ , b)  $\text{Mo}_3\text{N}_2\text{O}$ , c)  $\text{Cr}_3\text{N}_2\text{O}$ , d)  $\text{Nb}_3\text{N}_2\text{O}$ , e)  $\text{V}_3\text{N}_2\text{O}$ , f)  $\text{Hf}_3\text{N}_2\text{O}$  and g)  $\text{Zr}_3\text{N}_2\text{O}$  MXenes in the context of the pre-OER scenario (*cf.* **Figure S1**). The stability of  $\text{M}_{\text{SAC}}$  is referenced to different oxidative ion states resulting from the dissolution of the corresponding metals (*cf.* **Table S4** in the SI). Regions where  $3\text{O}^*-\text{M}_{\text{SAC}}-\text{O}$  is thermodynamically stable are colored blue, while a yellow background indicates that metal cations are energetically favored. The black, dashed line indicates the OER equilibrium potential on the SHE scale.

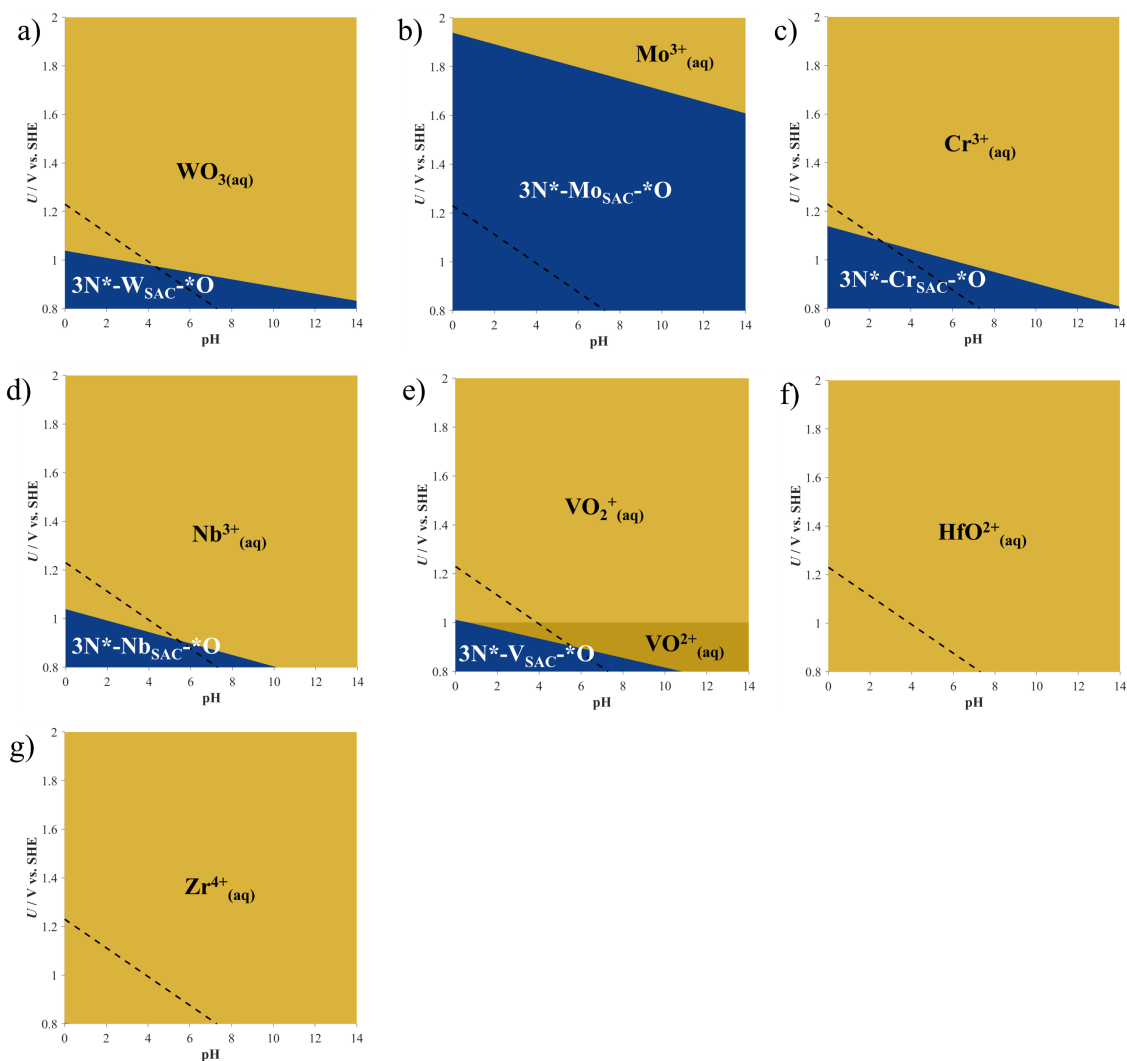

**Figure S15.** Pourbaix diagrams assessing the thermodynamic stability of SAC-like sites on the MXene basal plane,  $3\text{N}^*-\text{M}_{\text{SAC}}-\text{O}$ , of a)  $\text{W}_3\text{N}_2\text{O}$ , b)  $\text{Mo}_3\text{N}_2\text{O}$ , c)  $\text{Cr}_3\text{N}_2\text{O}$ , d)  $\text{Nb}_3\text{N}_2\text{O}$ , e)  $\text{V}_3\text{N}_2\text{O}$ , f)  $\text{Hf}_3\text{N}_2\text{O}$  and g)  $\text{Zr}_3\text{N}_2\text{O}$  MXenes in the context of the OER scenario (*cf.* **Figure S2**). The stability of  $\text{M}_{\text{SAC}}$  is referenced to different oxidative ion states resulting from the dissolution of the corresponding metals (*cf.* **Table S4** in the SI). Regions where  $3\text{N}^*-\text{M}_{\text{SAC}}-\text{O}$  is thermodynamically stable are colored blue, while a yellow background indicates that metal cations are energetically favored. The black, dashed line indicates the OER equilibrium potential on the SHE scale.

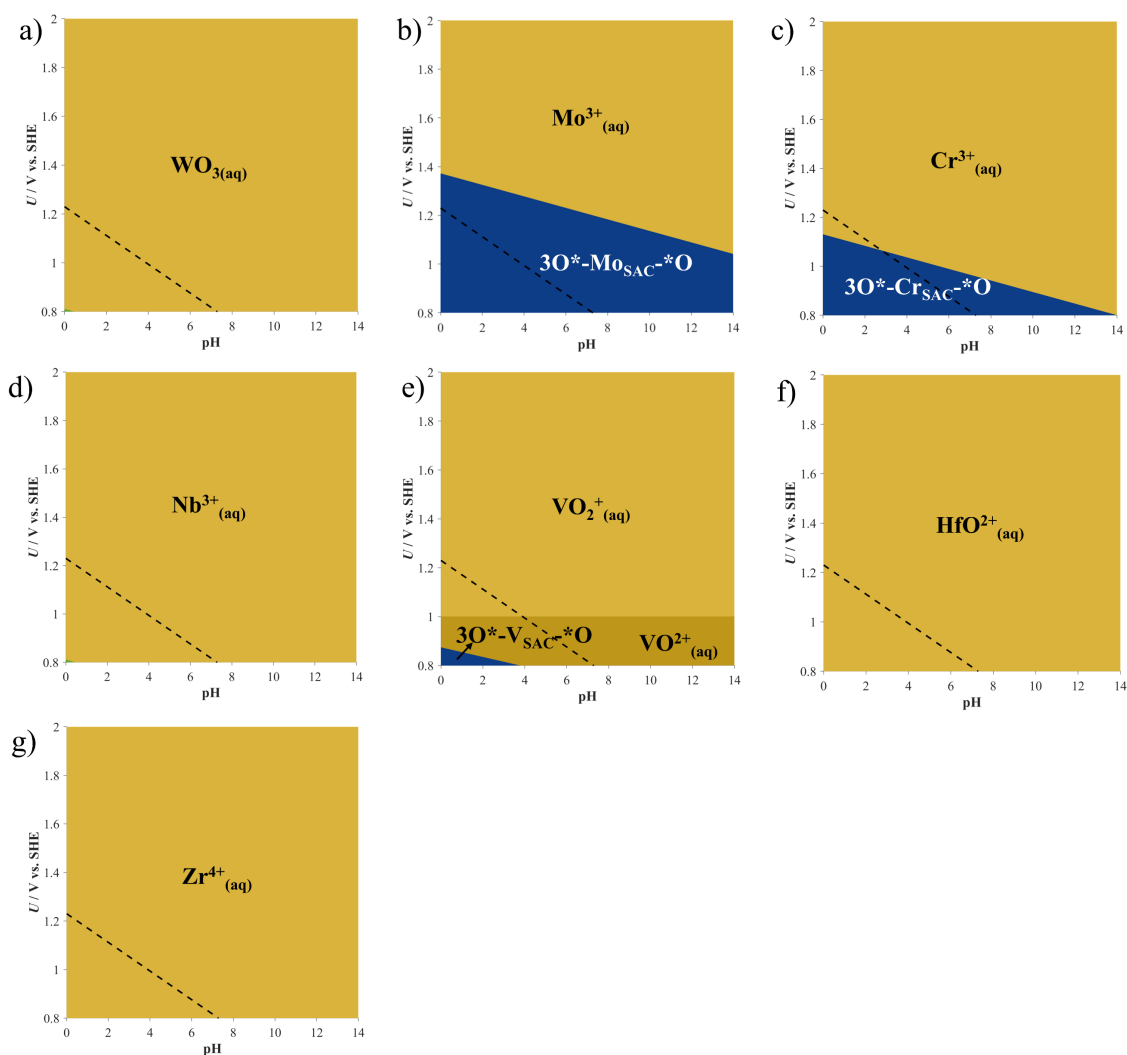

**Figure S16.** Pourbaix diagrams assessing the thermodynamic stability of SAC-like sites on the MXene basal plane,  $3\text{O}^*-\text{M}_{\text{SAC}}-\text{O}$ , of a)  $\text{W}_3\text{N}_2\text{O}$ , b)  $\text{Mo}_3\text{N}_2\text{O}$ , c)  $\text{Cr}_3\text{N}_2\text{O}$ , d)  $\text{Nb}_3\text{N}_2\text{O}$ , e)  $\text{V}_3\text{N}_2\text{O}$ , f)  $\text{Hf}_3\text{N}_2\text{O}$  and g)  $\text{Zr}_3\text{N}_2\text{O}$  MXenes in the context of the OER scenario (*cf.* **Figure S2**). The stability of  $\text{M}_{\text{SAC}}$  is referenced to different oxidative ion states resulting from the dissolution of the corresponding metals (*cf.* **Table S4** in the SI). Regions where  $3\text{O}^*-\text{M}_{\text{SAC}}-\text{O}$  is thermodynamically stable are colored blue, while a yellow background indicates that metal cations are energetically favored. The black, dashed line indicates the OER equilibrium potential on the SHE scale.



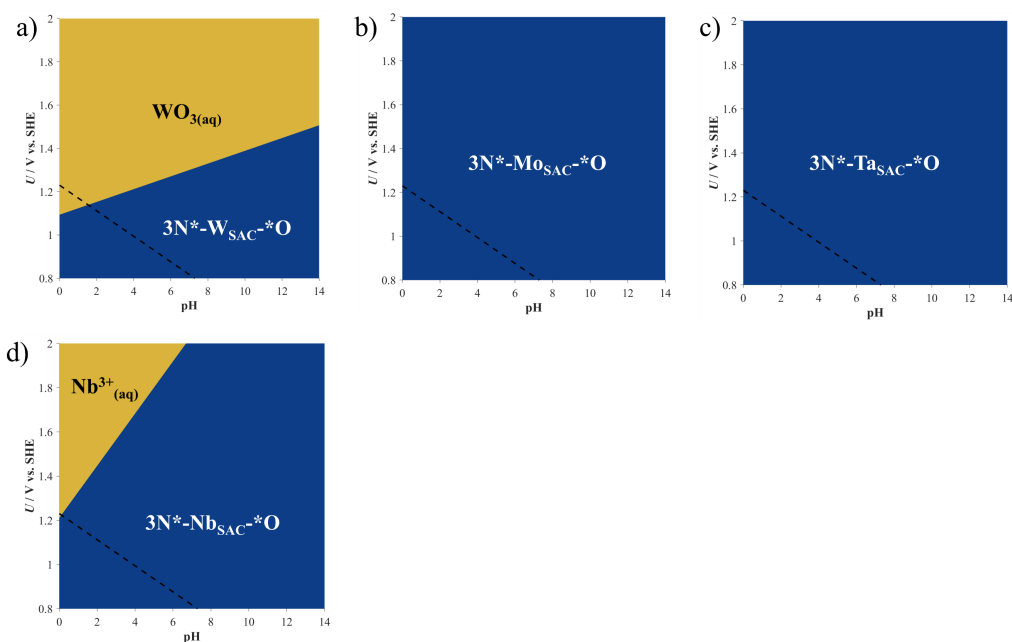

**Figure S17.** Pourbaix diagrams assessing the thermodynamic stability of SAC-like sites on the MXene basal plane,  $3N^*-M_{SAC}-*O$ , of a)  $W_4C_3O$ , b)  $Mo_4C_3O$ , c)  $Ta_4C_3O$  and d)  $Nb_4C_3O$  MXenes in the context of the pre-OER scenario (*cf.* **Figure S1**). The stability of  $M_{SAC}$  is referenced to different oxidative ion states resulting from the dissolution of the corresponding metals (*cf.* **Table S4** in the SI). Regions where  $3N^*-M_{SAC}-*O$  is thermodynamically stable are colored blue, while a yellow background indicates that metal cations are energetically favored. The black, dashed line indicates the OER equilibrium potential on the SHE scale.

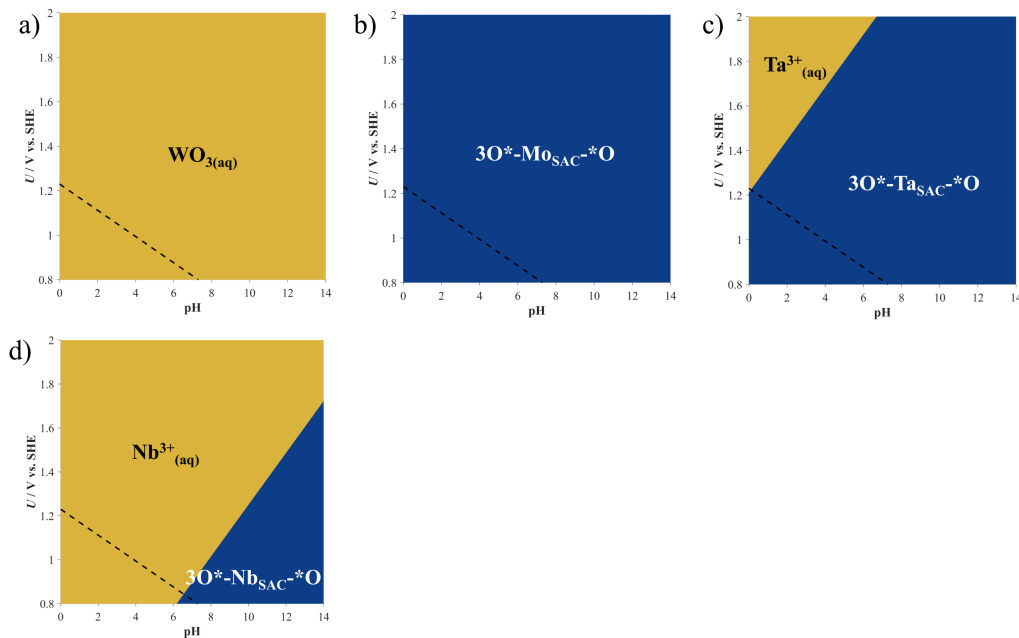

**Figure S18.** Pourbaix diagrams assessing the thermodynamic stability of SAC-like sites on the MXene basal plane,  $3O^*-M_{SAC}-*O$ , of a)  $W_4C_3O$ , b)  $Mo_4C_3O$ , c)  $Ta_4C_3O$  and d)  $Nb_4C_3O$  MXenes in the context of the pre-OER scenario (*cf.* **Figure S1**). The stability of  $M_{SAC}$  is referenced to different oxidative ion states resulting from the dissolution of the corresponding metals (*cf.* **Table S4** in the SI). Regions where  $3O^*-M_{SAC}-*O$  is thermodynamically stable are colored blue, while a yellow background indicates that metal cations are energetically favored. The black, dashed line indicates the OER equilibrium potential on the SHE scale.

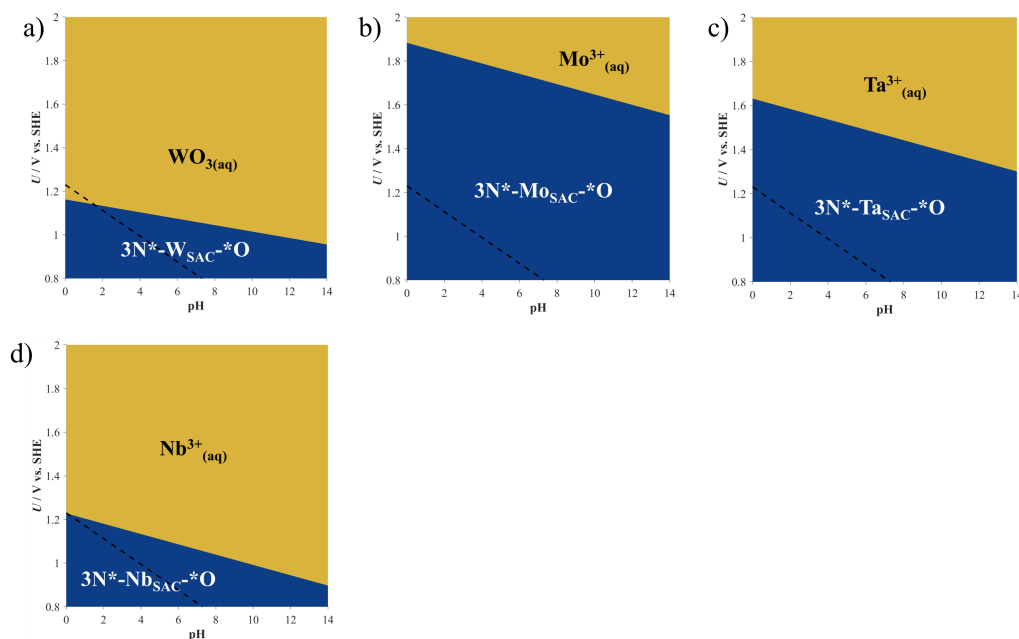

**Figure S19.** Pourbaix diagrams assessing the thermodynamic stability of SAC-like sites on the MXene basal plane,  $3N^*-M_{SAC}-*O$ , of a)  $W_4C_3O$ , b)  $Mo_4C_3O$ , c)  $Ta_4C_3O$  and d)  $Nb_4C_3O$  MXenes in the context of the OER scenario (*cf.* **Figure S2**). The stability of  $M_{SAC}$  is referenced to different oxidative ion states resulting from the dissolution of the corresponding metals (*cf.* **Table S4** in the SI). Regions where  $3N^*-M_{SAC}-*O$  is thermodynamically stable are colored blue, while a yellow background indicates that metal cations are energetically favored. The black, dashed line indicates the OER equilibrium potential on the SHE scale.

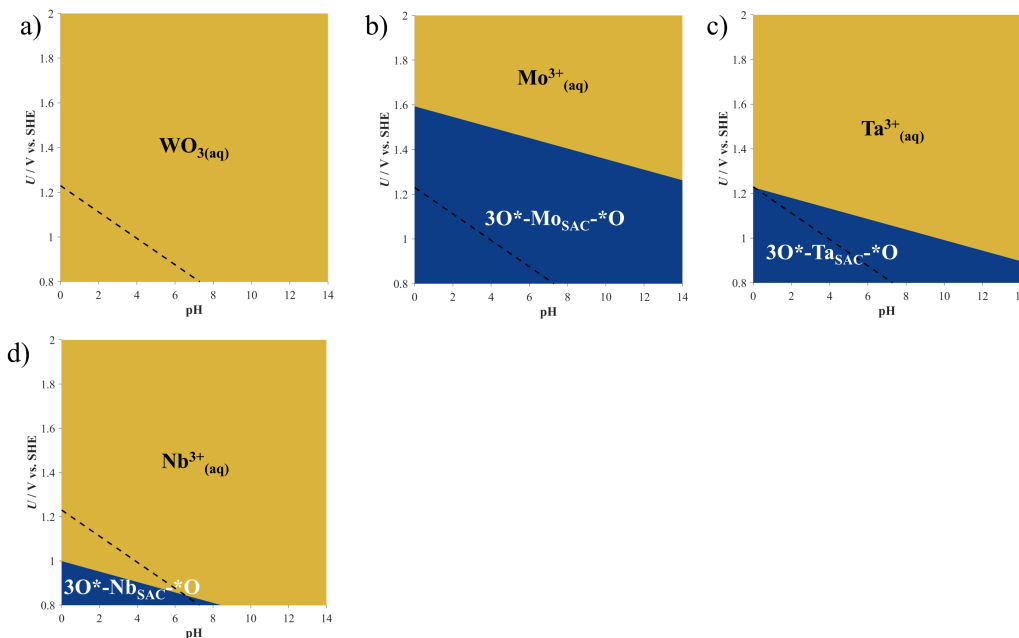

**Figure S20.** Pourbaix diagrams assessing the thermodynamic stability of SAC-like sites on the MXene basal plane,  $3O^*-M_{SAC}-*O$ , of a)  $W_4C_3O$ , b)  $Mo_4C_3O$ , c)  $Ta_4C_3O$  and d)  $Nb_4C_3O$  MXenes in the context of the OER scenario (*cf.* **Figure S2**). The stability of  $M_{SAC}$  is referenced to different oxidative ion states resulting from the dissolution of the corresponding metals (*cf.* **Table S4** in the SI). Regions where  $3O^*-M_{SAC}-*O$  is thermodynamically stable are colored blue, while a yellow background indicates that metal

cations are energetically favored. The black, dashed line indicates the OER equilibrium potential on the SHE scale.

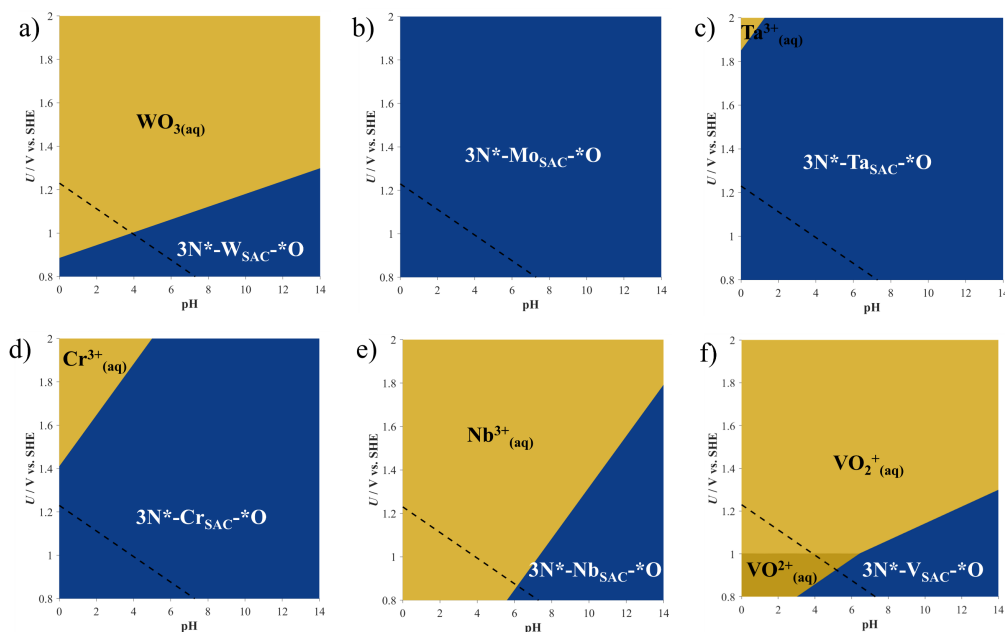

**Figure S21.** Pourbaix diagrams assessing the thermodynamic stability of SAC-like sites on the MXene basal plane,  $3N^*-M_{SAC}-*O$ , of a)  $W_4N_3O$ , b)  $Mo_4N_3O$ , c)  $Ta_4N_3O$ , d)  $Cr_4N_3O$ , e)  $Nb_4N_3O$  and f)  $V_4N_3O$  MXenes in the context of the pre-OER scenario (*cf.* **Figure S1**). The stability of  $M_{SAC}$  is referenced to different oxidative ion states resulting from the dissolution of the corresponding metals (*cf.* **Table S4** in the SI). Regions where  $3N^*-M_{SAC}-*O$  is thermodynamically stable are colored blue, while a yellow background indicates that metal cations are energetically favored. The black, dashed line indicates the OER equilibrium potential on the SHE scale.

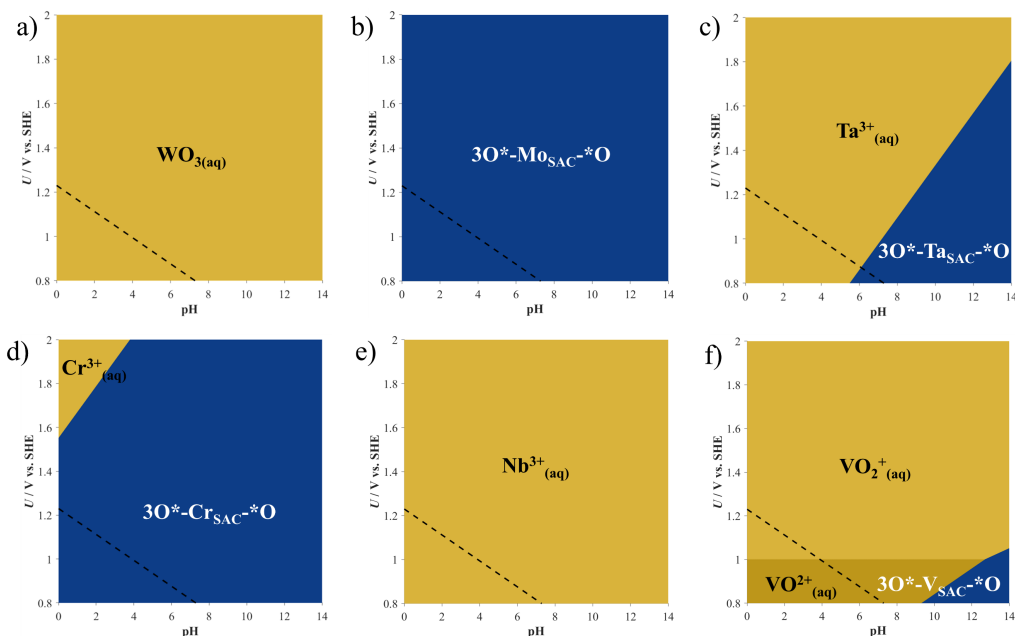

**Figure S22.** Pourbaix diagrams assessing the thermodynamic stability of SAC-like sites on the MXene basal plane,  $3O^*-M_{SAC}-*O$ , of a)  $W_4N_3O$ , b)  $Mo_4N_3O$ , c)  $Ta_4N_3O$ , d)  $Cr_4N_3O$ , e)  $Nb_4N_3O$  and f)  $V_4N_3O$  MXenes in the context of the pre-OER scenario (*cf.* **Figure S1**). The stability of  $M_{SAC}$  is referenced to different oxidative ion states resulting from the dissolution of the corresponding metals (*cf.* **Table S4** in the SI).

the SI). Regions where  $3\text{O}^*\text{-M}_{\text{SAC}}\text{-}^*\text{O}$  is thermodynamically stable are colored blue, while a yellow background indicates that metal cations are energetically favored. The black, dashed line indicates the OER equilibrium potential on the SHE scale.

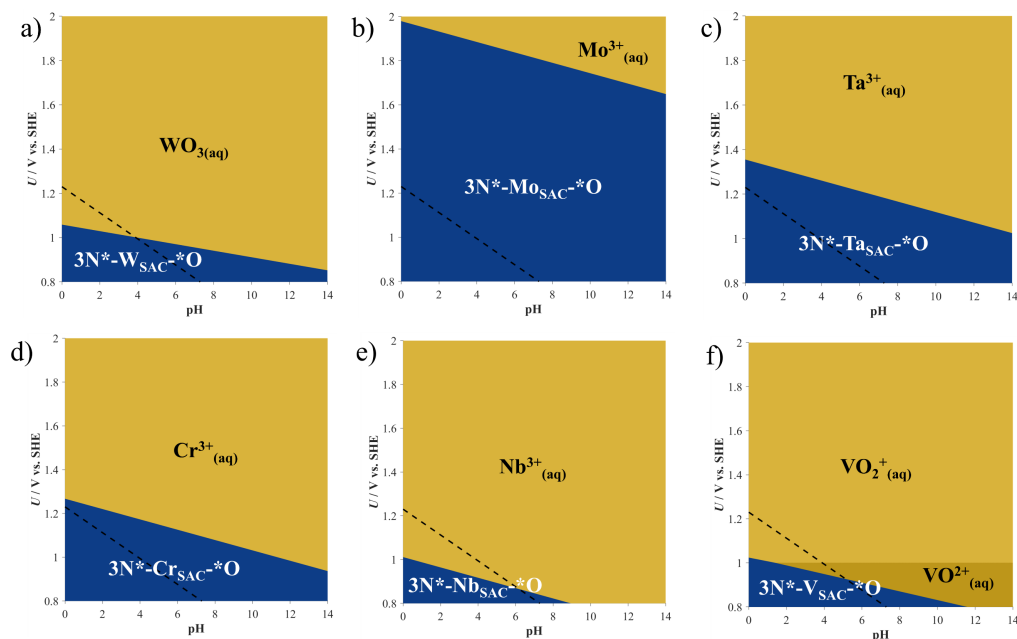

**Figure S23.** Pourbaix diagrams assessing the thermodynamic stability of SAC-like sites on the MXene basal plane,  $3\text{N}^*\text{-M}_{\text{SAC}}\text{-}^*\text{O}$ , of a)  $\text{W}_4\text{N}_3\text{O}$ , b)  $\text{Mo}_4\text{N}_3\text{O}$ , c)  $\text{Ta}_4\text{N}_3\text{O}$ , d)  $\text{Cr}_4\text{N}_3\text{O}$ , e)  $\text{Nb}_4\text{N}_3\text{O}$  and f)  $\text{V}_4\text{N}_3\text{O}$  MXenes in the context of the OER scenario (*cf.* **Figure S2**). The stability of  $\text{M}_{\text{SAC}}$  is referenced to different oxidative ion states resulting from the dissolution of the corresponding metals (*cf.* **Table S4** in the SI). Regions where  $3\text{N}^*\text{-M}_{\text{SAC}}\text{-}^*\text{O}$  is thermodynamically stable are colored blue, while a yellow background indicates that metal cations are energetically favored. The black, dashed line indicates the OER equilibrium potential on the SHE scale.

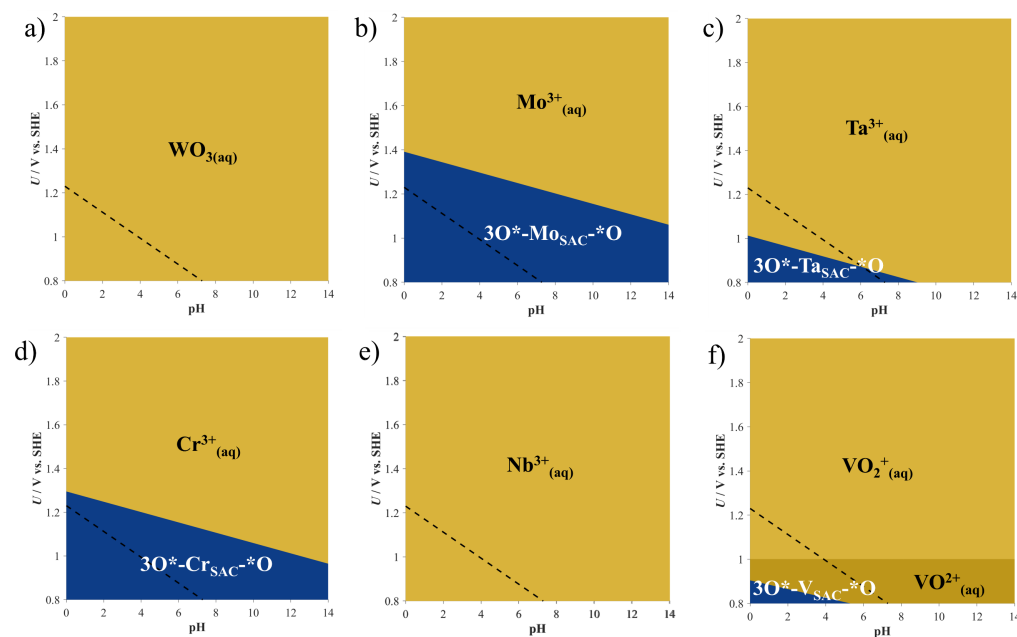

**Figure S24.** Pourbaix diagrams assessing the thermodynamic stability of SAC-like sites on the MXene basal plane,  $3\text{O}^*\text{-M}_{\text{SAC}}\text{-}^*\text{O}$ , of a)  $\text{W}_4\text{N}_3\text{O}$ , b)  $\text{Mo}_4\text{N}_3\text{O}$ , c)  $\text{Ta}_4\text{N}_3\text{O}$ , d)  $\text{Cr}_4\text{N}_3\text{O}$ , e)  $\text{Nb}_4\text{N}_3\text{O}$  and f)  $\text{V}_4\text{N}_3\text{O}$  MXenes in the context of the OER scenario (*cf.* **Figure S2**). The stability of  $\text{M}_{\text{SAC}}$  is referenced to different

oxidative ion states resulting from the dissolution of the corresponding metals (*cf.* **Table S4** in the SI). Regions where  $3\text{O}^*-\text{M}_{\text{SAC}}^*\text{O}$  is thermodynamically stable are colored blue, while a yellow background indicates that metal cations are energetically favored. The black, dashed line indicates the OER equilibrium potential on the SHE scale.

## Reference

---

1. Meng, L., Viñes, F., Illas, F. & Exner, K. S. Stability of single-atom centers of MXenes under anodic polarization conditions. *J. Phys. Chem. C* **129**, 9589–9601 (2025).
